# HIV-1 Vpr drives a tissue residency-like phenotype during selective infection of resting memory T cells

Ann-Kathrin Reuschl<sup>1</sup>, Maitreyi Shivkumar<sup>1,2</sup>, Dejan Mesner<sup>1</sup>, Laura J. Pallett<sup>1</sup>, José Afonso Guerra-Assunção<sup>1</sup>, Rajhmun Madansein<sup>3,4</sup>, Kaylesh J Dullabh<sup>3</sup>, Alex Sigal<sup>5,6,7</sup>, John P. Thornhill<sup>8,9</sup>, Carolina Herrera<sup>9</sup>, Sarah Fidler<sup>9,10</sup>, Mahdad Noursadeghi<sup>1</sup>, Mala K. Maini<sup>1</sup> and Clare Jolly<sup>1\*</sup>.

<sup>1</sup> Division of Infection and Immunity, University College London, London, UK

<sup>2</sup> Present address: Leicester School of Pharmacy, De Montfort University, Leicester, UK

<sup>3</sup> Department of Cardiothoracic Surgery, University of KwaZulu-Natal, Durban, South Africa

<sup>4</sup> Centre for the AIDS Programme of Research in South Africa, Durban, South Africa

<sup>5</sup> Africa Health Research Institute, Durban, South Africa

<sup>6</sup> School of Laboratory Medicine and Medical Sciences, University of KwaZulu-Natal, Durban, South Africa

<sup>7</sup> Max Planck Institute for Infection Biology, Berlin, Germany

<sup>8</sup> Peter Medawar Building for Pathogen Research, Nuffield Department of Medicine, University of Oxford, Oxford, UK.

<sup>9</sup> Department of Infectious Diseases, Faculty of Medicine, Imperial College, London, UK.

<sup>10</sup> Imperial College NIHR Biomedical Research Centre, London, UK.

1 **Human immunodeficiency virus type 1 (HIV-1) replicates in CD4+ T cells leading to profound**  
2 **T cell loss, immunological dysfunction and AIDS. Determining how HIV-1 shapes the**  
3 **immunological niche in which it resides to create a permissive environment is central to**  
4 **informing efforts to limit pathogenesis, disturb viral reservoirs and achieve a cure. A key**  
5 **roadblock in understanding HIV-T cell interactions is the requirement to activate CD4+ T cells**  
6 ***in vitro* in order to make them permissive to infection. This dramatically alters T cell biology,**  
7 **obscuring native virus-host interactions. Here we show that HIV-1 cell-to-cell spread permits**  
8 **efficient and productive infection of resting CD4+ T cells without the need for prior activation.**  
9 **Infection is preferential for resting memory T cells, is observed with both CXCR4-tropic virus**  
10 **and CCR5-tropic transmitter-founder viruses and results in virus production and onward**  
11 **spreading infection. Strikingly, we find that HIV-1 infection of resting memory CD4+ T cells**  
12 **primes for induction of a tissue-resident memory (T<sub>RM</sub>)-like phenotype evidenced by**  
13 **upregulation of T<sub>RM</sub> markers CD69/CXCR6 alongside co-expression of CD49a, PD-1, CD101**  
14 **as well as transcription factor Blimp-1. Furthermore, we reveal that HIV-1 initiates a**  
15 **transcriptional program that overlaps with the core T<sub>RM</sub> transcriptional signature. This**  
16 **reprogramming depends on the HIV-1 accessory protein Vpr. We propose that HIV-1 infection**

**drives a CD4+ T<sub>RM</sub>-phenotype potentially sequestering infected cells within tissues to support viral replication and persistence.**

## **Introduction**

Resting primary CD4+ T cells cannot be efficiently infected by cell-free HIV-1 virions *in vitro* and require robust mitogenic stimulation to support viral replication<sup>1-3</sup>. This has led to the notion that T cell activation is necessary for HIV-1 replication and that resting T cells are not permissive for HIV-1 infection. However, mitogenic T cell activation *in vitro* results in wide-spread phenotypic and functional reprogramming which dominates changes to gene and protein expression<sup>4-6</sup>, concealing and altering authentic virus-host interactions. This presents a significant challenge for understanding the cellular response to HIV-1 infection and the consequences of the virus-host interaction for HIV-1 replication and persistence. While it is clear HIV-1 efficiently infects and replicates in activated T cells, the outcomes of the virus-host interaction with resting T cells has been reported to be cell death<sup>7</sup> or latency<sup>8</sup>. However, previous data demonstrating that HIV-1 cell-to-cell spread is highly-efficient and drives widespread changes in protein phosphorylation status in both infected and target cells<sup>9-13</sup> suggested that cell-to-cell spread may overcome the barrier to productive infection of resting T cells. Here, we comprehensively show for the first time that HIV-1 exploits cell-to-cell spread to efficiently infect resting memory CD4+ T cells and have used this to uncover a hitherto unknown consequence of HIV-1 infection for T cell reprogramming driven by the accessory protein Vpr.

## **Results**

To test whether cell-to-cell spread allows for productive infection of resting T cells, HIV-1 infected Jurkat T cells (Fig. 1a) or primary CD4+ T cells (Fig. 1b) were co-cultured with uninfected resting CD4+ T cells (Extended data Fig. 1a-e). We confirmed that CD4+ T cells isolated from peripheral blood display a resting phenotype by staining for Ki67, CD69, HLA-DR and MCM2. (Extended data Fig. 1c-e). Infection of resting target cells in the absence of mitogenic or cytokine activation was measured. Direct co-culture of infected and uninfected cells resulted in significant levels of HIV-1

infection of resting CD4<sup>+</sup> target T cells (Gag<sup>+</sup>) measured by intracellular flow cytometry staining (Fig. 1a, b and Extended data Fig. 1f). By contrast, resting CD4<sup>+</sup>T cells were not infected (<1%) when cell-cell contact was prevented by separating the two cell populations by a transwell (Fig. 1a,b), a condition that only allows for cell-free infection. As expected, mitogenic activation of target T cells made them more permissive to cell-free HIV-1 but, as previously shown, infection was still substantially boosted by direct co-culture allowing for additional cell-to-cell spread (Extended data Fig.1f-h)<sup>9,11,12</sup>. Infection of resting CD4<sup>+</sup> target T cells was preferentially detected in CD45RA<sup>-ve</sup> resting memory T cell populations rather than CD45RA<sup>+</sup> naïve T cells, which are both abundant in peripheral blood (Fig. 1c-e, Extended Fig. 1i). Co-staining for CD62L confirmed that the infected CD45RA<sup>+</sup>ve cells were mainly naïve rather than T<sub>EMRA</sub> (Extended data Fig. 1j,k)<sup>14</sup>. The preferential infection of CD45RA<sup>-ve</sup> memory T cell populations rather than the CD45RA<sup>+</sup>ve naïve population, is in agreement with HIV-1 being predominantly detected in memory CD4<sup>+</sup> T cells *in vivo*<sup>15–17</sup>. This was not due to competition between naïve and memory cells because the same effect was observed when CD45RA<sup>+</sup>ve and CD45RA<sup>-ve</sup> resting CD4<sup>+</sup> target T cells were separated prior to cell-to-cell infection (Fig. 1f and Extended data Fig. 2a). Cell-to-cell infection of resting memory T cells was observed with CXCR4-tropic strain NL4.3, and CCR5-tropic viruses NL4.3 BaL and two transmitter-founder (T/F) primary isolates (CH040 and CH077) (Fig. 1g-i) demonstrating that selective permissivity was not unique to a particular virus or receptor tropism. Preventing viral entry with fusion inhibitor (T20), or blocking reverse transcription (Efavirenz), inhibited the appearance of Gag<sup>+</sup>ve or GFP<sup>+</sup>ve cells (Fig. 1j-l and Extended data Fig. 2b,c) demonstrating that this signal reflects productive infection and not simply virus capture<sup>9,11–13</sup>. Consistent with infection, we also observed downregulation of CD4 expression on target cells (Fig. 1m and Extended data Fig. 2d) that was most pronounced in the resting memory T cell population. Importantly, flow-sorting and culturing HIV-1 infected resting target T cells showed that these cells support viral replication by producing new virus and transmitting infection to new target cells (Fig. 1n-p and Extended data Fig. 2e), further demonstrating productive infection.

We confirmed that HIV-1<sup>+</sup> target T cells infected by cell-to-cell spread maintained their resting phenotype and did not upregulate Ki67 or MCM2, two markers of cell-cycle progression (Extended

72 data Fig. 3a,b), showing these cells were not simply being activated and driven into cell cycle, either  
 73 by infection or bystander effects during co-culture. Intriguingly, expression of CD69 on HIV-1 infected  
 74 resting memory target T cells was significantly increased compared to mock-treated target T cells  
 75 (Fig. 2a,b). This was not due to preferential infection of a minor pre-existing population of CD69+ve  
 76 CD4+ T cells in blood (Extended data Fig. 1c) because flow cytometry sorting of CD69-ve CD4+ T  
 77 cells (prior to co-culture with HIV-1 infected donor T cells) showed *de novo* upregulation of CD69 on  
 78 the newly-infected resting memory target cells (Extended data Fig.3c,d). While CD69 is classically  
 79 thought of as a marker of early T cell activation, expression can occur independently of cell cycle  
 80 progression and T cell activation<sup>18–20</sup>. Consistent with this we did not detect T cell activation  
 81 concomitant with CD69 upregulation in HIV-1 infected resting CD4+ memory T cells since CD69+ve  
 82 cells remained HLA-DR-negative (Extended data Fig.3e).

83 Functionally, CD69 is crucial for T cell retention in tissues by interfering with S1P receptor  
 84 mediated egress and has been identified as a hallmark of tissue-resident memory ( $T_{RM}$ ) T cells<sup>21</sup>.  
 85 Recently it has been demonstrated that although  $T_{RM}$  cells are largely absent in peripheral blood  
 86 (Extended data Fig. 3f), precursor cells poised to adopt a  $T_{RM}$  phenotype are present in  
 87 circulation<sup>22,23</sup>. Interestingly, while HIV-1 infection alone was associated with upregulation of CD69,  
 88 exposure of HIV-1 infected resting memory T cells to the homeostatic T cell cytokine IL7 further  
 89 boosted CD69 upregulation 4-fold, as compared to HIV-1 alone or IL7 alone (Fig. 2c and Extended  
 90 data Fig. 3j). IL7 secreted by stromal cells is required for long-term maintenance of CD4+  $T_{RM}$  cells<sup>24–</sup>  
 91 <sup>26</sup>. Although IL7 can enhance HIV-1 infection of T cells<sup>27</sup> (Extended data Fig. 3g), infection of resting  
 92 memory T cells mediated by cell-to-cell spread does not require IL7 (Fig.1) and IL7 increased CD69  
 93 expression on infected cells even when added 48h post-infection (Extended data Fig. 3j). HIV-1  
 94 induced CD69 upregulation was completely abrogated by suppressing infection with the fusion  
 95 inhibitor T20 (Fig. 2c) or by treating cells with Ruxolitinib that blocks IL7-mediated JAK signalling  
 96 (Fig. 2d) demonstrating that the enhanced CD69 induction requires both infection and cytokine  
 97 signalling. Similar infection-driven enhancement of CD69 expression was observed in response to  
 98  $\gamma_c$ -chain cytokine IL15 (Fig. 2e,f) but not IL12 or TGF- $\beta$  (Extended data Fig.3h,i). Consistent with the  
 99 hypothesis that HIV-1 infection induces a CD4+  $T_{RM}$ -like phenotypic signature, resting memory T

cells also upregulated the T<sub>RM</sub> marker CXCR6<sup>21</sup> during HIV-1 infection, (Fig. 2g,h and Extended data Fig. 3k,n), as well as increasing the population of CD69+ve cells co-expressing CD49a, PD-1 and CD101 that are also associated with the core T<sub>RM</sub> signature<sup>21</sup> (Fig. 2i, j and Extended data Fig. 3l). As expected for T<sub>RMS</sub>, we saw no upregulation of CX3CR1 expression (Extended data Fig. 3o) and no transcriptional upregulation of *S1PR1* or *KLF2* mRNA (Extended data Fig. 5i). Critically, induction of T<sub>RM</sub>-associated markers did not occur in uninfected Gag-ve bystander cells (Fig. 2k and Extended data Fig. 3m,n). By contrast to CD8+ T<sub>RM</sub> cells, CD103 was barely detectable and not upregulated (Extended data Fig. 3p,q), consistent with the observation of limited CD103 expression on CD4+ T cells<sup>21</sup>. Induction of CD69 expression was also concomitant with upregulation of the T<sub>RM</sub>-associated transcription factor Blimp-1<sup>28–30</sup> (Fig. 2l,m). Similar upregulation of T<sub>RM</sub>-associated markers were also observed when unstimulated CD4+ T cells from tonsil (Fig. 2n,o) or mediastinal lymph nodes (Fig. 2p,q) were infected with HIV-1 via cell-to-cell spread and exposed to IL7 (Fig. 2o,q), demonstrating that induction of TRM-like phenotype also occurs in tissue-derived T cells following HIV-1 infection. Taken together, these data suggest that HIV-1 infection of resting memory CD4+ T cells reprogrammes cells by upregulating expression of T<sub>RM</sub>-associated marker proteins, and thus induces a phenotype characteristic of tissue residency.

HIV-1 expresses four accessory proteins, Vif, Vpu, Vpr and Nef which directly and indirectly manipulate host cell factors to facilitate efficient viral replication *in vivo* and drive pathogenesis<sup>31</sup>. Co-culture of resting target T cells with donor T cells infected with HIV-1 accessory protein mutants showed that deletion of Vpr (HIV-1 ΔVpr) resulted in a complete abrogation of the T<sub>RM</sub>-like phenotype as evidenced by a lack of CD69 upregulation, and no detection of the CD69+/CXCR6+/CD49a+ triple-positive T<sub>RM</sub>-like memory population (Fig. 3a,b,d, Extended data Fig. 4 and 5a-e). By contrast, deletion of Vpu or Nef did not affect HIV-1 induction of T<sub>RM</sub>-markers on infected resting T cells (Fig. 3a,b, Extended data Fig. 4 and Fig. 5a-e). HIV-1 ΔVif could not be tested because Vif is required to antagonise APOBEC3-mediated viral restriction and allow infection<sup>32</sup>. HIV-1 Vpr is not required for infection of T cells *in vitro*<sup>33,34</sup> and concordantly, loss of T<sub>RM</sub>-marker protein induction was not due to lack of infection of target cells by HIV-1 ΔVpr virus, nor reduced Gag expression (Fig. 3c and Extended data Fig. 5f-h). Critically, Vpr was also required for induction of CD69 expression observed

at the mRNA level, as well as induction of *CXCR6* and Blimp1 (*PRDM1*) mRNA (Fig. 3e). As expected, there was no upregulation of *S1PR1* or *KLF2* mRNA by either HIV-1 WT or  $\Delta$ Vpr virus (Extended data Fig.5i), consistent with their suppression under conditions of T<sub>RM</sub> induction<sup>21</sup>. HIV-1 dependent upregulation of CD69 surface expression was inhibited by Ruxolitinib treatment (Fig. 2d) in a Vpr-dependent manner (Extended data Fig. 5j). Furthermore, HIV-1 infection downregulated the IL7 receptor alpha-subunit (CD127) from the cell surface (Extended data Fig 5k) and transcriptionally (fold change=0.693, adjusted p-value=5.89E-08, Supplementary table 1), indicative of activation of this pathway<sup>35</sup> by HIV-1. This was accompanied by a significant increase in the intracellular levels of phosphorylated transcription factor STAT5 (Extended data Fig. 5j and k). These data are consistent with Vpr manipulating cellular signalling pathways to drive induction of a T<sub>RM</sub>-like phenotype in response to IL7. Vpr-dependent T<sub>RM</sub>-like induction was also accompanied by spontaneous production of IFN $\gamma$  by infected CD4+ memory T cells (Fig. 3f), in line with the increased capacity of T<sub>RM</sub> to produce this cytokine<sup>21,36</sup>. Notably, Vpr-mediated induction of a T<sub>RM</sub>-like phenotype was not inhibited by the integrase inhibitor Raltegravir (Fig. 3g, h) that potently suppressed HIV-1 integration into resting memory CD4+ T cells infected by cell-to-cell spread (Fig. 3i), demonstrating that the T<sub>RM</sub>-like phenotype does not require integration. Of note, the presence of integrated provirus in resting CD4+ T cells (less than or equal to 1 provirus per cell Fig. 3i) further supports the observation that cell-to-cell spread results in resting CD4+ T cell infection (Fig. 1). Collectively, these data identify Vpr as the viral determinant required for upregulation of T<sub>RM</sub>-associated proteins on HIV-1 infected resting CD4+ T cells.

Vpr is a multifunctional protein that is packaged into viral particles and is present during the early stages of infection where it plays an important, but as yet poorly-defined role in HIV-1 pathogenesis. Amongst the best-defined functions of Vpr are its ability to a) bind the Cul4A-DDB1 (DCAF1) complex (leading to an interaction with the ubiquitinylation and proteasomal machinery); b) induce G2/M cell-cycle arrest and; c) drive apoptosis in infected cells<sup>37-41</sup>. We abrogated these functions individually by introducing the mutations Q65R, S79A or R80A into Vpr in the context of virus and confirmed that each Vpr mutant is packaged into virions (Fig. 3j). Co-culture of resting memory target T cells with HIV-1+ T cells infected with different Vpr mutants revealed that the Vpr



156 mutants S79A or R80A (inhibits cell cycle arrest) behaved similarly to WT virus and did not induce  
157 CD69 and CXCR6 upregulation (Fig. 3k-m). By contrast, Q65R (that is most closely associated with  
158 loss of DCAF1 binding) was unable to induce a T<sub>RM</sub>-like phenotype following infection of target cells,  
159 behaving like  $\Delta$ Vpr virus in these experiments (Fig. 3k-m).

160 Next we performed transcriptional profiling by RNA-Seq analysis of flow-sorted cells infected  
161 with HIV-1 WT or  $\Delta$ Vpr virus by cell-to-cell spread. Figure 4 shows that HIV-1 infection induced  
162 widespread changes to gene expression in resting memory T cells when compared to uninfected  
163 cells (232 differentially expressed genes (DEG), fold change >1.2, adjusted p-value<0.01) (Fig. 4).  
164 Hierarchical clustering and principal component analysis revealed that the gene expression patterns  
165 in response to HIV-1 WT infection were clearly distinct from those induced following infection with  
166  $\Delta$ Vpr virus (Fig. 4 a-c, e,f) demonstrating that Vpr-deletion suppresses the global transcriptional  
167 response to HIV-1 infection. Specifically, infection with  $\Delta$ Vpr virus resulted in only 13 genes showing  
168 statistically significant changes compared to uninfected cells, by contrast to 232 genes for HIV-1  
169 WT virus (Supplementary table 1 and 3, Fig. 4e). In fact, much of the transcriptional response to  
170 HIV-1 infection was regulated by Vpr, as evidenced by changes in DEG in the presence and absence  
171 of Vpr (Fig. 4f). The requirement for Vpr in driving many of the changes to DEG was also observed  
172 in response to IL7 (Fig. 4d, Supplementary table 2 and 4, and Extended data Fig. 6a). Consistent  
173 with Vpr manipulating the T cell response to HIV-1 infection (Supplementary table 5 and 6), gene-  
174 set enrichment analysis (GSEA) (Fig. 4g) and Ingenuity Pathway Analysis (IPA) (Fig. 4h and i)  
175 revealed enrichment of numerous cellular signalling pathways following HIV-1 infection that  
176 appeared Vpr-dependent, most notably pathways associated with cytokine and inflammatory  
177 responses as well as immune signalling (Fig. 4g, Extended data Fig. 6 and Supplementary table 7  
178 and 8). This was further evidenced by Upstream Regulator analysis that showed significant  
179 enrichment for genes associated with cytokine signalling and transcriptional regulators that were  
180 again largely Vpr-dependent (Fig. 4j and k, and Extended data Fig. 6). Taken together, these data  
181 reveal that HIV-1 induces dramatic reprogramming during infection of resting memory CD4<sup>+</sup> T cells  
182 that is driven largely by Vpr.

183 Tissue residency of T cells has been associated with a 31-gene core transcriptional  
 184 signature<sup>21</sup>. We took advantage of this dataset and our RNAseq analysis to determine whether this  
 185 core T<sub>RM</sub> signature was enriched in our transcriptome of HIV-1 infected resting memory T cells.  
 186 Hierarchical clustering of our data, compared to the core signature of T<sub>RM</sub> cells (CD69+ve T cells  
 187 isolated from human lung and spleen)<sup>21</sup> from Kumar et al, showed that HIV-1 infected memory T  
 188 cells exposed to IL7 grouped distinctly and clustered with CD69+ve T<sub>RM</sub> cells (Fig. 5a,  
 189 Supplementary table 9) distinct from non-T<sub>RM</sub> T cells (CD69-ve T cells isolated from tissue and blood  
 190 from Kumar et al). We further corroborated this finding by calculating a T<sub>RM</sub> enrichment score based  
 191 on the published core transcriptional signature, which showed that HIV-1 infected resting memory T  
 192 cells (both +/-IL7) harbour a higher T<sub>RM</sub> signature score, significantly different from non-T<sub>RM</sub> T cells,  
 193 approximating more closely to that of *bona fide* T<sub>RM</sub> cells (Fig. 5b). Critically, this was Vpr-dependent,  
 194 with mock and ΔVpr infected cells showing an enrichment score that was not statistically different to  
 195 non-T<sub>RM</sub>. Taken together, these data demonstrate that HIV-1 induces both a phenotypic and  
 196 transcriptional T<sub>RM</sub>-like signature in resting T cells via the accessory protein Vpr.

197

## 198 Discussion

199 Our discovery that resting CD4+ T cells can be productively infected by cell-to-cell spread, allowing  
 200 for viral integration, replication and dissemination, transforms our ability to determine how T cells  
 201 respond to and support HIV-1 replication without confounding activation-induced changes.  
 202 Recently, it has been reported that cell-to-cell spread can also facilitate latent infection of resting T  
 203 cells without productive infection<sup>8</sup>. Together, these two studies highlight the distinct advantages of  
 204 co-culture models (that do not require mitogenic, experimental stimulation of T cells to drive infection)  
 205 to study native HIV-1-host cell interactions and the cellular response to infection.

206 Here we have employed our co-culture model to show that HIV-1 infection of resting memory  
 207 T cells induces a T<sub>RM</sub>-like phenotype evidenced by upregulation and co-expression of T<sub>RM</sub>-associated  
 208 markers on infected cells and induction of a core T<sub>RM</sub> transcriptional signature. HIV-1 establishes  
 209 cellular and tissue reservoirs (both active and latent) that ultimately prevent cure with antiretroviral



210 therapy. Importantly, T<sub>RM</sub> cells are long-lived and are thought to be largely confined to tissue<sup>42</sup>  
 211 providing an alternate model for a tissue-associated reservoir driven by the virus itself. Our results  
 212 suggest that HIV-1 persistence and the establishment of tissue reservoirs may be driven, in part,  
 213 through direct viral induction of a T<sub>RM</sub>-like phenotype via transcriptional reprogramming. Recently,  
 214 TRM in cervical tissue were found to be preferentially infected by HIV-1 and can harbour an HIV-1  
 215 reservoir *in vivo*<sup>43</sup>. The relative contribution of pre-existing versus HIV-1 induced T<sub>RM</sub> cells to viral  
 216 reservoirs and their relative abundance in different anatomical compartments *in vivo* remains to be  
 217 quantified, but we expect T<sub>RM</sub> cells harbouring virus to be important contributors to viral persistence.  
 218 In light of these findings it is possible that HIV-1 infected cells circulating in peripheral blood may in  
 219 fact represent cells that have failed to become part of the tissue reservoir, leading to an  
 220 underestimation of the true viral burden. Having shown that HIV-1 infection of resting T cells by cell-  
 221 to-cell spread results in productive infection, we hypothesise that induction of a T<sub>RM</sub>-like phenotype  
 222 in infected cells may also play additional roles in establishing and maintaining viral reservoirs by  
 223 sequestering infected cells in tissue sites where susceptible target T cells are in abundance, thus  
 224 supporting localised viral replication. Indeed we have shown that infected resting memory T cells  
 225 support spreading infection to disseminate virus. Given the importance of T<sub>RM</sub> cells as a population  
 226 that are increasingly recognised to be critical in providing localised immunity and  
 227 immunosurveillance<sup>20,30</sup>, future work should focus on understanding the contribution of HIV-1  
 228 induced T<sub>RM</sub>-like cells in pathogenesis and persistence.

229 It is now emerging that committed T<sub>RM</sub> precursors, imprinted with the capacity to become  
 230 mature T<sub>RM</sub> pre-exist in blood and that when exposed to the appropriate cues in tissues or *ex vivo*  
 231 can become tissue-resident<sup>22,23</sup>. Thus the ontogeny, derivation and maintenance of T<sub>RM</sub> cells  
 232 appears more complex than initially appreciated. Our discovery that HIV-1 induces a T<sub>RM</sub>-like  
 233 phenotype in CD4+ T cells provides an opportunity to gain new understanding of mechanisms behind  
 234 CD4+ T<sub>RM</sub> induction and maintenance.

235 We found that HIV-1 infection of resting memory T cells was associated with striking  
 236 transcriptional reprogramming that was licensed by Vpr, thus identifying a novel function for this  
 237 enigmatic HIV accessory protein. Notably, HIV-1 induction of a T<sub>RM</sub>-like phenotype via Vpr was

238 accompanied by induction of a T<sub>RM</sub> transcriptional signature that aligned closely with a published  
 239 core T<sub>RM</sub> signature<sup>21</sup>. Vpr-deletion not only abolished induction of this T<sub>RM</sub> signature, but also many  
 240 HIV-1 induced changes to gene expression following infection of resting T cells. This is in keeping  
 241 with wide-spread proteome remodelling by Vpr in activated T cells<sup>44</sup>, but suggests that these  
 242 changes may be driven in part by a hitherto unappreciated role for Vpr in modulating the host cell  
 243 gene expression profile. Whether this reflects wide-spread epigenetic changes mediated by Vpr or  
 244 manipulation of key upstream regulators remains to be determined. Our data show HIV-1 Vpr  
 245 modulates T cell responsiveness to external stimuli by manipulation of immune signalling pathways,  
 246 including innate and inflammatory responses. This is particularly intriguing and suggests HIV-1  
 247 manipulates immune signalling pathways to benefit the virus, in this case by priming resting memory  
 248 T cells for T<sub>RM</sub>-like induction. Vpr-mediated induction of T<sub>RM</sub>-like phenotype was dependent on  
 249 residue Q65 and Vpr is reported to drive wide-spread remodelling of the cellular proteome via its  
 250 recruitment of DCAF1 through Q65<sup>44</sup>. Whether this requirement for Q65 in induction of a T<sub>RM</sub>-like  
 251 phenotype is DCAF1-dependent or not remains unclear because DCAF1 knockdown in primary T  
 252 cells made cells hyper-responsive to HIV-1 induced cell death (Extended data Fig. 7). Thus we  
 253 cannot at present formally exclude other functions of Vpr Q65 in the process of T<sub>RM</sub>-induction.

254 Notably, a rare case of laboratory-derived infection with Vpr-defective HIV-1 was  
 255 characterised by markedly delayed seroconversion, suppressed viremia and normal CD4+ T cell  
 256 counts<sup>45</sup>, consistent with reduced pathogenesis and failure to establish and maintain a significantly  
 257 large tissue reservoir. We envisage therapeutic targeting of Vpr to manipulate persistence and  
 258 pathogenesis. In order to achieve an HIV-1 cure it is essential to understand the nature and  
 259 establishment of HIV-1 reservoirs and how to manipulate them. By demonstrating that HIV-1  
 260 infection drives a T<sub>RM</sub>-like phenotype during infection of resting memory T cells we have taken a  
 261 significant step towards this to help accelerate the quest for an HIV-1 cure.

262

263

264

## 265     **References**

- 266     1.     Swiggard, W. J. *et al.* Human Immunodeficiency Virus Type 1 Can Establish Latent Infection  
267             in Resting CD4 + T Cells in the Absence of Activating Stimuli. *J. Virol.* **79**, 14179–14188  
268             (2005).
- 269     2.     Stevenson, M., Stanwick, T. L., Dempsey, M. P. & Lamonica, C. A. HIV-1 replication is  
270             controlled at the level of T cell activation and proviral integration. *EMBO J.* **9**, 1551–60  
271             (1990).
- 272     3.     Zack, J. A. *et al.* HIV-1 entry into quiescent primary lymphocytes: molecular analysis reveals  
273             a labile, latent viral structure. *Cell* **61**, 213–22 (1990).
- 274     4.     Wolf, T. *et al.* Dynamics in protein translation sustaining T cell preparedness. *Nat. Immunol.*  
275             **21**, 927–937 (2020).
- 276     5.     Szabo, P. A. *et al.* Single-cell transcriptomics of human T cells reveals tissue and activation  
277             signatures in health and disease. *Nat. Commun.* **10**, 4706 (2019).
- 278     6.     Howden, A. J. M. *et al.* Quantitative analysis of T cell proteomes and environmental sensors  
279             during T cell differentiation. *Nat. Immunol.* **20**, 1542–1554 (2019).
- 280     7.     Doitsh, G. *et al.* Abortive HIV infection mediates CD4 T cell depletion and inflammation in  
281             human lymphoid tissue. *Cell* **143**, 789–801 (2010).
- 282     8.     Agosto, L. M., Herring, M. B., Mothes, W. & Henderson, A. J. HIV-1-Infected CD4+ T Cells  
283             Facilitate Latent Infection of Resting CD4+ T Cells through Cell-Cell Contact. *Cell Rep.* **24**,  
284             2088–2100 (2018).
- 285     9.     Jolly, C., Kashefi, K., Hollinshead, M. & Sattentau, Q. J. HIV-1 cell to cell transfer across an  
286             Env-induced, actin-dependent synapse. *J. Exp. Med.* **199**, 283–93 (2004).
- 287     10.     Sattentau, Q. Avoiding the void: cell-to-cell spread of human viruses. *Nat. Rev. Microbiol.* **6**,  
288             815–826 (2008).
- 289     11.     Sourisseau, M., Sol-Foulon, N., Porrot, F., Blanchet, F. & Schwartz, O. Inefficient Human

- 290           Immunodeficiency Virus Replication in Mobile Lymphocytes. *J. Virol.* **81**, 1000–1012 (2007).
- 291   12.   Hübner, W. *et al.* Quantitative 3D video microscopy of HIV transfer across T cell virological  
292           synapses. *Science*. **323**, 1743–7 (2009).
- 293   13.   Len, A. C. L., Starling, S., Shivkumar, M. & Jolly, C. HIV-1 Activates T Cell Signaling  
294           Independently of Antigen to Drive Viral Spread. *Cell Rep.* **18**, 1062–1074 (2017).
- 295   14.   Sallusto, F., Lenig, D., Förster, R., Lipp, M. & Lanzavecchia, A. Pillars Article : Two Subsets  
296           of Memory T Lymphocytes with Distinct Homing Potentials and Effector Functions . *Nature* .  
297           *Nature* **401**, 708–712 (1999).
- 298   15.   Shan, L. *et al.* Transcriptional Reprogramming during Effector-to-Memory Transition  
299           Renders CD4 + T Cells Permissive for Latent HIV-1 Infection. *Immunity* **47**, 766-775.e3  
300           (2017).
- 301   16.   Brenchley, J. M. *et al.* T-cell subsets that harbor human immunodeficiency virus (HIV) in  
302           vivo: implications for HIV pathogenesis. *J. Virol.* **78**, 1160–8 (2004).
- 303   17.   Chomont, N. *et al.* HIV reservoir size and persistence are driven by T cell survival and  
304           homeostatic proliferation. *Nat. Med.* **15**, 893–900 (2009).
- 305   18.   Corneau, A. *et al.* Comprehensive Mass Cytometry Analysis of Cell Cycle, Activation, and  
306           Coinhibitory Receptors Expression in CD4 T Cells from Healthy and HIV-Infected  
307           Individuals. *Cytom. Part B - Clin. Cytom.* **92**, 21–32 (2017).
- 308   19.   Lea, N. C. *et al.* Commitment Point during G 0 → G 1 That Controls Entry into the Cell Cycle  
309           Commitment Point during G 0 3 G 1 That Controls Entry into the Cell Cycle. *Mol. Cell. Biol.*  
310           **23**, 2351–2361 (2003).
- 311   20.   Szabo, P. A., Miron, M. & Farber, D. L. Location, location, location: Tissue resident memory  
312           T cells in mice and humans. *Sci. Immunol.* **4**, eaas9673 (2019).
- 313   21.   Kumar, B. V *et al.* Human Tissue-Resident Memory T Cells Are Defined by Core  
314           Transcriptional and Functional Signatures in Lymphoid and Mucosal Sites. *Cell Rep.* **20**,  
315           2921–2934 (2017).

- 316 22. Kok, L. *et al.* A committed tissue-resident memory T cell precursor within the circulating  
317 CD8+ effector T cell pool. *J. Exp. Med.* **217**, (2020).
- 318 23. Fonseca, R. *et al.* Developmental plasticity allows outside-in immune responses by resident  
319 memory T cells. *Nat. Immunol.* **21**, 412–421 (2020).
- 320 24. Yeon, S. M. *et al.* IL-7 plays a critical role for the homeostasis of allergen-specific memory  
321 CD4 T cells in the lung and airways. *Sci. Rep.* **7**, 1–9 (2017).
- 322 25. Adachi, T. *et al.* Hair follicle-derived IL-7 and IL-15 mediate skin-resident memory T cell  
323 homeostasis and lymphoma. *Nat. Med.* **21**, 1272–1279 (2015).
- 324 26. Amezcua Vesely, M. C. *et al.* Effector TH17 Cells Give Rise to Long-Lived TRM Cells that  
325 Are Essential for an Immediate Response against Bacterial Infection. *Cell* **178**, 1176-  
326 1188.e15 (2019).
- 327 27. Coiras, M. *et al.* IL-7 Induces SAMHD1 Phosphorylation in CD4+ T Lymphocytes, Improving  
328 Early Steps of HIV-1 Life Cycle. *Cell Rep.* **14**, 2100–2107 (2016).
- 329 28. Hombrink, P. *et al.* Programs for the persistence, vigilance and control of human CD8 +  
330 lung-resident memory T cells. *Nat. Immunol.* **17**, 1467–1478 (2016).
- 331 29. Mackay, L. K. *et al.* Hobit and Blimp1 instruct a universal transcriptional program of tissue  
332 residency in lymphocytes. **352**, 459–464 (2016).
- 333 30. Pallett, L. J. *et al.* IL-2(high) tissue-resident T cells in the human liver: Sentinels for  
334 hepatotropic infection. *J. Exp. Med.* **214**, 1567–1580 (2017).
- 335 31. Malim, M. H. & Emerman, M. HIV-1 Accessory Proteins-Ensuring Viral Survival in a Hostile  
336 Environment. *Cell Host Microbe* **3**, 388–398 (2008).
- 337 32. Sheehy, A. M., Gaddis, N. C. & Malim, M. H. The antiretroviral enzyme APOBEC3G is  
338 degraded by the proteasome in response to HIV-1 Vif. *Nat. Med.* **9**, 1404–1407 (2003).
- 339 33. Balliet, J. W. *et al.* Distinct Effects in Primary Macrophages and Lymphocytes of the Human  
340 Immunodeficiency Virus Type 1 Accessory Genes vpr, vpu, and nef: Mutational Analysis of

- 341 a Primary HIV-1 Isolate. *Virology* **200**, 623–631 (1994).
- 342 34. Rogel, M. E., Wu, L. I. & Emerman, M. The human immunodeficiency virus type 1 vpr gene  
343 prevents cell proliferation during chronic infection. *J. Virol.* **69**, 882–8 (1995).
- 344 35. Park, J. H. *et al.* Suppression of IL7R $\alpha$  transcription by IL-7 and other prosurvival cytokines:  
345 A novel mechanism for maximizing IL-7-dependent T cell survival. *Immunity* **21**, 289–302  
346 (2004).
- 347 36. Kumar, B. V. *et al.* Functional heterogeneity of human tissue-resident memory T cells based  
348 on dye efflux capacities. *JCI insight* **3**, (2018).
- 349 37. Jowett, J. B. *et al.* The human immunodeficiency virus type 1 vpr gene arrests infected T  
350 cells in the G2 + M phase of the cell cycle. *J. Virol.* **69**, 6304–13 (1995).
- 351 38. Wu, Y. *et al.* The DDB1-DCAF1-Vpr-UNG2 crystal structure reveals how HIV-1 Vpr steers  
352 human UNG2 toward destruction. *Nat. Struct. Mol. Biol.* **23**, 933–939 (2016).
- 353 39. Laguette, N. *et al.* Premature activation of the slx4 complex by vpr promotes g2/m arrest  
354 and escape from innate immune sensing. *Cell* **156**, 134–145 (2014).
- 355 40. Schröfelbauer, B., Hakata, Y. & Landau, N. R. HIV-1 Vpr function is mediated by interaction  
356 with the damage-specific DNA-binding protein DDB1. *Proc. Natl. Acad. Sci. U. S. A.* **104**,  
357 4130–4135 (2007).
- 358 41. Wen, X., Duus, K. M., Friedrich, T. D. & De Noronha, C. M. C. The HIV1 protein Vpr acts to  
359 promote G2 cell cycle arrest by engaging a DDB1 and cullin4A-containing ubiquitin ligase  
360 complex using VprBP/DCAF1 as an adaptor. *J. Biol. Chem.* **282**, 27046–27051 (2007).
- 361 42. Kumar, B. V., Connors, T. J. & Farber, D. L. Human T Cell Development, Localization, and  
362 Function throughout Life. *Immunity* **48**, 202–213 (2018).
- 363 43. Cantero-Pérez, J. *et al.* Resident memory T cells are a cellular reservoir for HIV in the  
364 cervical mucosa. *Nat. Commun.* **10**, (2019).
- 365 44. Greenwood, E. J. D. *et al.* Promiscuous Targeting of Cellular Proteins by Vpr Drives



Systems-Level Proteomic Remodeling in HIV-1 Infection. *Cell Rep.* **27**, 1579-1596.e7 (2019).

45. Ali, A. *et al.* Highly attenuated infection with a VPR-deleted molecular clone of human immunodeficiency virus-1. *J. Infect. Dis.* **218**, 1447–1452 (2018).

## Methods

### Cells

Peripheral blood mononuclear cells (PBMC) were isolated from buffy coats from healthy donors (UK NHS Blood and Transplant Service) by density centrifugation using FicollPaque Plus (GE Life Sciences) and cryopreserved in 10% DMSO (Sigma-Aldrich) in 90% FBS (LabTech). Resting CD4+ T cells were isolated from total PBMCs by negative selection using the MojoSort Human CD4+ T Cell Isolation kit (Biolegend) according to the manufacturer's instructions. CD45RA+ve naïve and CD45RA-ve memory populations were further separated after CD4+ T cell isolation with CD45RA MicroBeads (Biolegend). For activated CD4+ T cells, PBMCs were treated with 5µg/ml PHA (Sigma) and 10IU/ml IL2 (Centre For AIDS Reagents, National Institute of Biological Standards and Control, UK [CFAR]) in RPMI1640 with 20% FBS for 72h prior to CD4+ T cell isolation. Once purified, CD4+ T cells were cultured in RPMI supplemented with 20% FBS and 10IU/ml IL2. Jurkat T cell lines (Clone E6-1; ATCC TIB-152) were cultured in RPMI with 10% FBS and 100U/ml penicillin/streptomycin. HEK 293T/17 cells (ATCC, CRL-11268) were cultured in DMEM with 10% FBS and 100U/ml penicillin/streptomycin. Tonsil tissue was obtained from an individual with primary HIV infection who underwent routine tonsillectomy (2 months after commencement of ART). As previously described<sup>46</sup>, the tonsillar tissue from elective tonsillectomy was dissected and mechanically digested, prior to cryopreservation of the cellular suspension. This was collected under the Imperial College Infectious Diseases Biobank (REC: 15/SC/0089). Lymph nodes were obtained from the field of surgery of participants undergoing surgery for diagnostic purposes and/or complications of inflammatory lung disease. Informed consent was obtained from each participant,

and the study protocol approved by the University of KwaZulu-Natal Institutional Review Board (approval BE024/09).

## Plasmids and virus production

The HIV-1 clone pNL4.3 was obtained from the CFAR, NIBSC (cat# 2006). HIV-1 NL4.3  $\Delta$ Nef and pNL4.3  $\Delta$ Vpr were provided by R. Sloan (University of Edinburgh, UK)<sup>47</sup>. NL4.3  $\Delta$ Vpu was provided by S. Neil (King's College London, UK)<sup>48</sup>. NLENG1-IRES was provided by D. Levy (NYU, USA)<sup>49</sup>. NL4.3 bearing the CCR5-tropic BaL *Env* was provided by G. Towers (UCL, UK)<sup>50</sup>. CCR5 tropic transmitter/founder virus plasmids CH044 and CH077 were provided by G. Towers (UCL, UK) and were originally obtained through the NIH AIDS Reagent Program [NIHARP], Division of AIDS, NIAID, NIH: pCH040.c/2625 (cat# 11740) and pCH077.t/2627 (cat# 11742) from Dr. John Kappes and Dr. Christina Ochsenbauer. NL4.3 Vpr Q65R, NL4.3 Vpr S79A, NL4.3 Vpr R80A were generated by site-directed mutagenesis (Promega) using the following primers:

NL4.3 VprQ65R fw:GTGGAAGCCATAATAAGAATTCTGCGACAACTGCTGTTTATCCATTTTCAG

NL4.3 VprQ65R rv:CTGAAATGGATAAACAGCAGTTGTCGCAGAATTCTTATTATGGCTTCCAC

NL4.3 Vpr S79A fw: GAATTGGGTGTCGACATGCCAGAATAGGCGTTACTC

NL4.3 Vpr S79A rv:GAGTAACGCCTATTCTGGCATGTGCGACACCCAATTC

NL4.3 Vpr R80A fw: GGTGTCGACATAGCGCAATAGGCGTTACTCG

NL4.3 Vpr R80A rv: CGAGTAACGCCTATTGCGCTATGTGCGACACC.

All virus stocks were produced by plasmid transfection of HEK 293T cells with Fugene 6 (Promega). Supernatants were harvested at 48h and 72h, filtered, DNase treated, purified and concentrated by ultracentrifugation through a 25% sucrose cushion and resuspended in RPMI1640 with 10% FBS. Viral titres were determined by measuring reverse transcriptase activity by SG-PERT assay<sup>51</sup>.

## HIV-1 infection and cell-to-cell spread

For cell-to-cell spread experiments, activated primary CD4+ T cells (donor cells) were infected with 800mU reverse transcriptase per 10<sup>6</sup> cells of HIV-1 by spinoculation at 1200xg for 2h at room temperature and incubated in RPMI 20% FBS supplemented with 10IU/ml IL2 for 72h. HIV-1+ donor

CD4+ T cells were washed with medium, counted and cultured with primary CD4+ target T cells at a 1:1 ratio in RPMI 20% FBS supplemented with 10IU/ml IL2 for up to 72h before analysis by flow cytometry or FACS sorting. Uninfected target CD4+ T cells were pre-stained with 1-2nM CellTrace FarRed dye (Invitrogen) prior to co-culture. For cell-to-cell spread into tonsil-derived lymphocytes, total tonsil lymphocytes were cultured at a 4:1 ratio with HIV-1 infected or uninfected eFluor450-labelled Jurkat T cells. For FACS sorting experiments, donor cells were pre-labeled with cell dye eFluor450 (ThermoFisher). For transwell experiments, HIV-1 infected donor T cells were separated from target T cells by a 0.4µm transwell insert (Corning). Experiments to quantify cell-to-cell versus cell-free infection in the presence and absence of a transwell were performed in equivalent volumes (600µl). For some experiments, FACS sorted infected resting CD4+ target T cells were returned into culture for up to 4 days. Infection levels were measured by intracellular Gag staining and flow cytometry, and virus release into cell culture supernatant determined by SG-PERT<sup>51</sup>. At day 1 or day 4 post FACS sorting, resting CD4+ T cells were washed extensively and co-cultured at a 1:1 ratio with uninfected eFluor450-labelled Jurkat T cells for 72h, when Jurkat T cell infection was measured by Gag-staining. Where indicated, cultures were incubated in the presence of 20ng/ml IL7 (Miltenyi Biotec), 20ng/ml IL15 (Peprotech), 20ng/ml IL12 (Peprotech) or 50ng/ml TGFβ (Peprotech). The following inhibitors were added 30min before co-culture at the following concentrations: T20 (25-50ng/ml, CFAR), Efavirenz (1µM, CFAR), Raltegravir (5µM, CFAR) and Ruxolitinib (50nM, Sigma). For RNAi knockdown of DCAF1, primary CD4+T cells were activated for 4 days with 1µg/ml plate-bound αCD3 antibody (cloneOKT3, Biolegend) in the presence of 2 µg/mL soluble αCD28 antibody(clone CD28.2, Biolegend). RNAi knockdown of DCAF1 was performed as described before<sup>52</sup> using ON-TARGET plusHuman DCAF1 siRNA - SMARTpool (Dharmacon) and non-targeting siRNA (Dharmacon) was used as a control. 2×10<sup>6</sup>cells were electroporated with 200 pmol siRNA using a NeonTransfection System (Thermo Fisher Scientific; three pulses, 10 ms, 1,600 V). After 48h, DCAF1 knockdowns were confirmed by western blotting and cells used in cell-to-cell spread experiments as described above.

447

448

## 449 Flow cytometry and FACS

450 For flow cytometry analysis, cells were washed in PBS and stained with fixable Zombie UV  
451 Live/Dead dye, Aqua Live/Dead dye or NIR Live/Dead dye (Biolegend) for 5 min at 37°C. Excess  
452 stain was quenched with FBS-complemented RPMI. When tonsil and lymph node lymphocytes were  
453 used, Live/Dead staining was quenched using human AB serum (Sigma) in RPMI. Cell surface  
454 staining was performed in PBS, complemented with 20% Super Bright Staining Buffer  
455 (ThermoFisher) when appropriate, at 4°C for 30min. Unbound antibody was washed off thoroughly  
456 and cells were fixed with 4% FA or PFA before intracellular staining. For intracellular detection of  
457 IFN $\gamma$  in infected target CD4 $^{+}$  T cells after 72h of cell-to-cell spread, cells were treated throughout the  
458 co-culture with IL7 and Brefeldin A (Biolegend) treated for 6h before surface staining and fixation.  
459 Permeabilisation for intracellular staining was performed with IC perm buffer or FoxP3 Buffer set  
460 (Biolegend) according to the manufacturer's instructions. For detection of intracellular P-STAT5,  
461 cells were resuspended in ice cold True-Phos Perm buffer (Biolegend) and permeabilised for 48h at  
462 -20°C. Intracellular P-STAT5 staining was then performed in PBS with wash steps performed at 1800  
463 rpm for 6 min at 4°C. The following antibody clones and fluorochromes were used: CD3 (UCHT1,  
464 Biolegend; Bv510, Bv711, FITC), CD8 (SK1, Biolegend; Bv605, PE), CD4 (SK3, Biolegend;  
465 APC/Fire750); CD45RA (HI100, Biolegend; Bv421, PE-Dazzle); CD45RO (UCHL1, Biolegend;  
466 PerCp-Cy5.5), CD69 (FN50, Biolegend; APC/Fire750, PE-Dazzle); CXCR6/CD186 (K041ES,  
467 Biolegend; PE-Dazzle); MCM2 (ab4461, ABCAM; was detected with a secondary anti-rabbit  
468 AlexaFluor488-tagged antibody); HLA-DR (L234, Biolegend; PerCp-Cy5.5); CD49a (TS2/7,  
469 Biolegend; PE-Cy7); PD-1 (EH12.2H7, Biolegend; PE-Cy7); Ki67 (Ki-67, Biolegend; Bv711, PE);  
470 Blimp-1 (6D3, BD Pharmingen; PE); CD101 (BB27, Biolegend; PE-Cy7); CX3CR1 (2A9-1,  
471 Biolegend; PE-Dazzle); CD103 (Ber-ACT8, Biolegend; Bv711); CD127 (AO19D5, Biolegend; PE-  
472 Cy7), IFN $\gamma$  (B27, Biolegend; PE), Phospho-STAT5 (Clone 47/Stat5 (pY694), BD; PE) and HIV-1  
473 Gag core antigen (FH190-1-1, Beckman Coulter; PE, FITC). All samples were acquired on either an  
474 BD Fortessa X20 or LSR II using BD FACSDiva software and analyzed using FlowJo v10 (Tree  
475 Star). FACS sorting was performed with a BD FACSAria III or BD FACSAria IIu Cell Sorter. Cells  
476 were either lysed immediately in RLT lysis buffer (Qiagen) with 1%  $\beta$ -mercaptoethanol (Sigma) and  
477 stored at -80°C for later RNA extraction or resuspended in RPMI supplemented with 20% FBS and  
478 10IU/ml IL2 and used immediately.

## 479 **Western blotting**

480 Virus-containing supernatants (normalised for equal loading by measuring RT activity) or fifteen  
481 micrograms of total CD4+ T cell protein lysate were separated by SDS-PAGE, transferred onto  
482 nitrocellulose and blocked in PBS with 0.05% Tween 20 (v/v) and 5% skimmed milk (w/v). Blots  
483 were probed with rabbit antisera raised against HIV-1 Gag p24 (cat# 0432 donated by Dr G. Reid  
484 and obtained from the CFAR), Vpr anti-serum (cat# 3951, NIH ARP),  $\alpha$ -alpha-Tubulin (T6199,  
485 Sigma-Aldrich) and  $\alpha$ -DCAF1 antibody (11612-1-AO, Proteintech), followed by goat anti-rabbit or  
486 goat anti-mouse IRdye 800CW or 680RD infrared secondary antibody (Abcam) and imaged using  
487 an Odyssey Infrared Imager (LI-COR Biosciences) and analysed with Image Studio Lite software.

488

## 489 **Quantification of HIV-1 integration**

490 To quantify integration of HIV-1 in resting T cells, nested Alu-gag quantitative PCR was performed  
491 as previously described<sup>53</sup>. Briefly, DNA was isolated from FACS sorted infected resting CD4+  
492 memory T cells after 72h of cell-to-cell spread using the Qiagen Blood Mini Kit.

493 Integrated DNA was pre-amplified using 100nM Alu fw primer, 600nM HIV-1 Gag rv primer, 0.2mM  
494 dNTP, 1U Phusion Hot Start Flex (Promega), and 45ng DNA in 50 $\mu$ l reactions. Cycling conditions  
495 were: 94°C for 30s, followed by 40 cycles of 94°C for 10s, 55°C for 30s, and 70°C for 2.5min. For  
496 quantitation of HIV-1 integration, a second round real-time quantitative PCR was performed using  
497 the pre-amplified DNA. These samples were run alongside a standard curve of known dilutions of  
498 CEM cells containing integrated HIV-1 DNA. Reactions contained 0.25 $\mu$ M of RU5 fw and rv primers,  
499 and 0.2 $\mu$ M probes, 1x Qiagen Multiplex Mastermix, and 10 $\mu$ l pre-amplified DNA. Cyclin conditions  
500 were: 95°C for 15min, followed by 50 cycles of 94°C for 60s and 60°C for 60s. 2LTR circles were  
501 measured by quantitative PCR<sup>54</sup>. Reactions contained 150ng DNA, 10 $\mu$  2LTR fw and rv primers,  
502 10 $\mu$ M probe and 1x TaqMan Gene Expression Master Mix (ThermoFisher). Cycling conditions were:  
503 95°C for 15min, followed by 50 cycles of 95°C for 15s and 60°C for 90s. Reactions were performed  
504 using 7500 Real-Time PCR System (Applied Biosystems). The following primers and probes were  
505 used:

506 Alu fw: GCCTCCCAAAGTGCTGGGATTACAG

507 HIV-1 Gag rv: GTTCCTGCTATGTCACTTCC

508 RU5 fw: TTAAGCCTCAATAAAGCTTGCC

509 RU5 rv: GTTCGGGCGCCACTGCTAGA

510 RU5-WT probe: FAM-CCAGAGTCACACAACAGACGGGCACA-TAMRA

511 RU5-degenerate 1 probe: FAM-CCAGAGTCACATAACAGACGGGCACA-TAMRA

512 RU5-degenerate 2 probe: FAM-CCAGAGTCACACAACAGATGGGCACA-TAMRA

513 2LTR fw: AACTAGAGATCCCTCAGACCCTTTT

514 2LTR rv: CTTGTCTTCGTTGGGAGTGAAT

515 2LTR probe: FAM-CTAGAGATTTTCCCACTGAC-TAMRA

516

## 517 **qRT-PCR**

518 RNA was extracted from FACS sorted target memory CD4+ T cells with RNeasy Micro Kit (Qiagen)  
519 according to the manufacturer's instructions. cDNA was synthesised using SuperScript IV with  
520 random hexamer primers (Invitrogen) and qRT-PCR was performed using Fast SYBR Green Master  
521 Mix and 7500 Real-Time PCR System (Applied Biosystems). Gene expression was determined  
522 using the  $2^{-\Delta\Delta Ct}$  method and normalised to GAPDH expression. The following primers were used:

523 *GAPDH* fw: ACATCGCTCAGACACCATG, rv: TGTAGTTGAGGTCAATGAAGGG;

524 *CXCR6* fw: GACTATGGGTTTCAGCAGTTTCA, rv: GGCTCTGCAACTTATGGTAGAAG;

525 *PRDM1* fw: ATGCGGATATGACTCTGTGGA, rv: CTGAACCGAAGTACCGCCATC;

526 *CD69* fw: ATTGTCCAGGCCAATACACATT, rv: CCTCTCTACCTGCGTATCGTTTT;

527 *S1PR1* fw: TCTGCTGGCAAATTCAAGCGA, rv: GTTGTCCCCTTCGTCTTTCTG;

528 *KLF2* fw: CTACACCAAGAGTTTCGCATCTG; rv: CCGTGTGCTTTCCGGTAGTG.

529

530

## 531 **Whole transcriptome profiling by RNA-Sequencing**

532 RNA was extracted from FACS sorted target memory CD4+ T cells with RNeasy Micro Kit (Qiagen)  
533 according to the manufacturer's instructions. For preparation of RNA-Sequencing libraries, RNA  
534 concentration was measured using the Qubit RNA High Sensitivity kit (Life Technologies) and quality  
535 checked on the 4200 TapeStation using either the High Sensitivity or standard RNA ScreenTape  
536 assay (Agilent Technologies), depending on the measured RNA concentrations. PolyA-tailed mRNA



537 was separated for sequencing during library preparation. Libraries were prepared using KAPA's  
538 mRNA HyperPrep kit (Roche Diagnostics) according to the manufacturer's instructions using an  
539 input of up to 200ng and a fragmentation incubation time of 8 minutes at 94°C. Samples were  
540 sequenced on Illumina's NextSeq500 (Illumina Cambridge) using a high output 75 cycle paired-end  
541 run. 24 libraries were multiplexed in the same run. Libraries were pooled in equimolar quantities,  
542 calculated from concentrations measured using the Qubit dsDNA High Sensitivity kit (Life  
543 Technologies) and fragment analysis using the D1000 High Sensitivity assay on the 4200  
544 TapeStation (Agilent Technologies).

545 RNA sequencing data was quality assessed using FASTQC  
546 (<https://www.bioinformatics.babraham.ac.uk/projects/fastqc/>) before and after low-quality and  
547 adapter trimming using Trimmomatic<sup>55</sup>. Filtered reads were then pseudo-mapped using Kallisto<sup>56</sup> to  
548 the transcriptome available in Ensembl v.101 (<http://aug2020.archive.ensembl.org/index.html>). Per-  
549 transcript counts were imported and aggregated per gene using the TXimport R package<sup>57</sup>. The  
550 DESeq2 package<sup>58</sup> was used for data normalisation, outlier detection and differential gene  
551 expression analysis between biological groups. The DESeq2 results were ranked based on the log2  
552 transformation of the adjusted p-values, to provide a pre-ranked list for Gene Set Enrichment  
553 Analysis (GSEA)<sup>59</sup> as described in the GSEA documentation. Pathway enrichment and upstream  
554 regulator analysis was performed using Gene Set Enrichment Analysis (GSEA)<sup>59</sup> and Ingenuity  
555 Pathway Analysis (IPA, ) respectively. Heatmaps were generated using ClustVis  
556 (<https://biit.cs.ut.ee/clustvis/>)<sup>60</sup>

557

558

559

## 560 **Transcriptomic comparison with published human T<sub>RM</sub> cells**

561 TPM data from previously published transcriptomes of human T<sub>RM</sub> cells (GSE94964)<sup>21</sup> were summed  
562 on gene level with Ensembl gene ID, gene name, and gene biotype using tximport and BioMart<sup>57,61</sup>.  
563 TPM values <0.001 were adjusted to 0.001 as a lower limit of detection. These data were aligned to  
564 the transcriptomic data from the present study using gene symbol in an integrated Log<sub>2</sub> transformed  
565 data matrix and subjected to batch correction by study using Combat<sup>62</sup>. Expression of selected genes

previously identified to be up and downregulated in  $T_{RM}$ <sup>21</sup> were used to cluster the samples in both studies using 1-Spearman rank correlation with average linkage in ClustVis<sup>60</sup>. A transcriptional signature score for  $T_{RM}$  was derived from the difference between the sum of up and down-regulated genes in  $T_{RM}$  in the previously published signature. This score was used to evaluate the relative similarity of each transcriptome data set in the present project to  $T_{RM}$  and non- $T_{RM}$  data.

## Statistical analysis

Statistical analysis was performed using GraphPad Prism. Normally distributed data was analysed for statistical significance by two-tailed *t*-tests (when comparing two groups) or one-way ANOVA with Bonferroni or Dunnett's post-test (when comparing more than two groups). Data show the mean +/- the S.E.M with significance shown on the figures. Where appropriate, the median+IQR is shown and Kruskal-Wallis test was used to compare groups. Significance levels were defined as \*,  $P < 0.05$ ; \*\*,  $P < 0.01$  and \*\*\*,  $P < 0.001$ .

## Methods References

46. Thornhill, J. P. *et al.* CD32 expressing doublets in HIV-infected gut-associated lymphoid tissue are associated with a T follicular helper cell phenotype. *Mucosal Immunol.* (2019). doi:10.1038/s41385-019-0180-2
47. Sloan, R. D. *et al.* Transcription of Preintegrated HIV-1 cDNA Modulates Cell Surface Expression of Major Histocompatibility Complex Class I via Nef. *J. Virol.* **85**, 2828–2836 (2011).
48. Neil, S. J. D., Eastman, S. W., Jouvenet, N. & Bieniasz, P. D. HIV-1 Vpu promotes release and prevents endocytosis of nascent retrovirus particles from the plasma membrane. *PLoS Pathog.* **2**, 354–367 (2006).
49. Trinité, B. *et al.* Suppression of Foxo1 activity and down-modulation of CD62L (L-selectin) in HIV-1 infected resting CD4 T cells. *PLoS One* **9**, (2014).

- 593 50. Rasaiyaah, J. *et al.* HIV-1 evades innate immune recognition through specific cofactor  
594 recruitment. *Nature* **503**, 402–405 (2013).
- 595 51. Pizzato, M. *et al.* A one-step SYBR Green I-based product-enhanced reverse transcriptase  
596 assay for the quantitation of retroviruses in cell culture supernatants. *J. Virol. Methods* **156**,  
597 1–7 (2009).
- 598 52. Mesner, D., Hotter, D., Kirchhoff, F. & Jolly, C. Loss of Nef-mediated CD3 down-regulation  
599 in the HIV-1 lineage increases viral infectivity and spread. *Proc. Natl. Acad. Sci. U. S. A.*  
600 **117**, 7382–7391 (2020).
- 601 53. Liszewski, M. K., Yu, J. J. & O'Doherty, U. Detecting HIV-1 integration by repetitive-  
602 sampling Alu-gag PCR. *Methods* **47**, 254–260 (2009).
- 603 54. Apolonia, L. *et al.* Stable gene transfer to muscle using non-integrating lentiviral vectors.  
604 *Mol. Ther.* **15**, 1947–1954 (2007).
- 605 55. Bolger, A. M., Lohse, M. & Usadel, B. Trimmomatic: A flexible trimmer for Illumina sequence  
606 data. *Bioinformatics* **30**, 2114–2120 (2014).
- 607 56. Bray, N. L., Pimentel, H., Melsted, P. & Pachter, L. Near-optimal probabilistic RNA-seq  
608 quantification. *Nat. Biotechnol.* **34**, 525–527 (2016).
- 609 57. Soneson, C., Love, M. I. & Robinson, M. D. Differential analyses for RNA-seq: Transcript-  
610 level estimates improve gene-level inferences [version 2; referees: 2 approved].  
611 *F1000Research* **4**, 1–23 (2016).
- 612 58. Anders, S. & Huber, W. Differential expression analysis for sequence count data. *Genome*  
613 *Biol.* **11**, (2010).
- 614 59. Subramanian, A. *et al.* Gene set enrichment analysis: A knowledge-based approach for  
615 interpreting genome-wide expression profiles. *Proc. Natl. Acad. Sci. U. S. A.* **102**, 15545–  
616 15550 (2005).
- 617 60. Metsalu, T. & Vilo, J. ClustVis: A web tool for visualizing clustering of multivariate data using  
618 Principal Component Analysis and heatmap. *Nucleic Acids Res.* **43**, W566–W570 (2015).

- 619 61. Smedley, D. *et al.* The BioMart community portal: An innovative alternative to large,  
620 centralized data repositories. *Nucleic Acids Res.* **43**, W589–W598 (2015).
- 621 62. Leek, J. T., Johnson, W. E., Parker, H. S., Jaffe, A. E. & Storey, J. D. The SVA package for  
622 removing batch effects and other unwanted variation in high-throughput experiments.  
623 *Bioinformatics* **28**, 882–883 (2012).

624

## 625 **Acknowledgements**

626 This work was funded by a Wellcome Trust Investigator award (108079/Z/15/Z) to C.J. We are  
627 grateful to members of the Jolly lab, as well as Greg Towers, Rebecca Sumner, Lorena Zulianai-  
628 Alvarez, Lucy Thorne, Laura McCoy and Richard Milne for helpful discussions and critical reading of  
629 the manuscript. We thank Jamie Evans (UCL) for assistance with sorting CD69-negative T cells and  
630 Parisa Amjadi (Imperial College London Chelsea and Westminster Hospital) for sorting target T cells  
631 from co-culture experiments and the Pathogen Genomics Unit (PGU) at UCL for RNAseq analysis.  
632 We acknowledge the NIBSC Centre for AIDS Reagents, the NIH AIDS Reagent Program and  
633 Imperial College NIHR Biomedical Research Centre, London, UK.

634

## 635 **Author contributions**

636 A.K.R., and C.J. conceived the project. A.K.R., and C.J. designed the experiments. A.K.R., M.S. and  
637 D.M performed the experiments. A.K.R., C.J., L.P., M.K.M., M.S., D.M., A.G-A and M.N. analysed  
638 the data. L.P. and M.K.M provided reagents. J.P.T., C.H., S.F., R.M, K.J.D., and A.S. provided  
639 lymphoid tissue samples. A.G-A and M.N. performed the core T<sub>RM</sub> transcriptional mapping analysis.  
640 A.K.R., and C.J. prepared the manuscript. All authors provided critical review of the manuscript.

641

## 642 **Competing interest**

643 The authors declare they have no competing interests.

644

645

646

## 647 **Figure legends:**

### 648 **Fig. 1 HIV-1 exploits cell-to-cell spread to preferentially infect resting memory CD4+ T cells.**

649 HIV-1 NL4.3 infected (a) Jurkat or (b) mitogenically-activated primary CD4+ donor T cells co-cultured  
650 with resting primary CD4+ target T cells separated by a 0.4µm transwell (cell-free) or direct co-culture  
651 (cell-cell). Target cell infection was measured by intracellular staining for HIV-1 Gag protein.  
652 Representative flow cytometry plots are shown. Bar graphs show mean of independent experiments  
653 (n=4). (c,d) Cell-to-cell spread from activated primary donor CD4+ T cells to resting primary target  
654 CD4+ T cells preferentially infects CD45RA- memory CD4+ T cells. A representative flow cytometry  
655 plot and quantification is shown (n=4). (e) Quantification of infection performed as in (c) (n=11). (f)  
656 HIV-1 infection of target CD4+ T cells as part of the total resting CD4+ T cell population (total)  
657 compared to pre-isolated naive and memory CD4+ target T cells (isolated) (n=9). (g) Representative  
658 flow cytometry plots of cell-to-cell infection of resting CD4+ T cells with CCR5-tropic HIV-1 NL4.3  
659 BaL and transmitter founder viruses HIV-1 CH040 and CH077 as performed in (c). (h) Quantification  
660 of infection of CXCR4 (X4) and CCR5 (R5)-tropic viruses (n=4) and (i) transmitter/founder viruses  
661 HIV-1 CH040 and CH077 (n=7). (j) Cell-to-cell infection of resting CD4+ T cells is reduced by the  
662 HIV-1 fusion-inhibitor T20 (n=6) and (k) the reverse transcriptase inhibitor Efavirenz (n=6) measured  
663 by intracellular Gag staining (MFI) or (l) HIV-1 LTR-driven GFP-reporter gene expression (n=4). (m)  
664 HIV-1 infection downregulates CD4 expression. Shown are the percentage of CD4+ cells of the total  
665 CD3+ target cell population (n=6). Resting CD4+ memory T cells were isolated after 72h of cell-to-  
666 cell spread by FACS sorting and cultured for 4 days. HIV-1 infection was measured by intracellular  
667 Gag staining (n) and virus release measured by culture supernatant RT activity (o) (n=5-7). T cells  
668 from (n) were recovered at day 1 or 4 post isolation and cultured with uninfected eFluor450+ target  
669 Jurkat T cells. Infection of Jurkat T cells was measured after 72h (p) (n=3). Data are the mean±SEM.  
670 Paired two-tailed *t*-test or one-way ANOVA with Bonferroni post-test were used. For (m),  
671 median+IQR is shown and Friedman test with Dunn's post-test was used. For (o), unpaired one-  
672 tailed *t*-test was used. \*, *p*<0.05 ; \*\*, *p*<0.01; \*\*\*, *p*<0.001; n.s., not significant.

673

**Fig. 2 HIV-1 infection induces a T<sub>RM</sub>-like phenotype in resting memory CD4+ T cells.** (a) CD69 expression on resting memory CD4+ target T cells following co-culture with HIV-1 infected primary donor T cells or uninfected donor T cells (mock) (n=17). (b) Representative flow cytometry plots from (a). (c) CD69 expression on infected resting memory CD4+ T cells  $\pm$  IL7 and T20 (n=7). (d) CD69 expression on infected resting memory CD4+ T cells  $\pm$  IL7 and Ruxitinib (n=8). (e) CD69 expression on infected resting memory CD4+ T cells in response to IL7 and IL15 (n=11). (f) CD69 expression on infected Gag+ resting memory CD4+ T cells and uninfected Gag- bystander cells in response to IL7 and IL15 (n=11). (g) CXCR6 surface expression from (f) (n=11). (h) Representative flow cytometry plots of CD69 and CXCR6 co-expression. (i) Co-expression of CD69 with CXCR6, CD49A or PD-1 on infected resting memory CD4+ T cells (n=5-7). (j) As for (i) in the presence of IL7 (n=4-7). (k) As for (i) comparing infected Gag+ memory CD4+ T cells and uninfected Gag- bystander cells. (l) and (m) Blimp-1 expression in CD69+ infected resting memory CD4+ T cells and infected CD69- cells in response to IL7 (n=8). (n) Total lymphocytes from cellularised tonsils co-cultured with HIV-1 infected Jurkat T cells. Infection of resting CD4+ T cells (live CD3+/CD8-/Ki67- lymphocytes) shown as CD45RO vs Gag. (o) CD69 and CXCR6 co-expression on infected Gag+ and uninfected Gag- tonsil resting memory CD4+ T cells  $\pm$  IL7. (p) Total lymphocytes from mediastinal lymph nodes co-cultured with HIV-1 infected activated autologous LN-derived lymphocytes. Infection of resting CD4+ T cells (live CD3+/CD8-/Ki67- lymphocytes) shown as CD45RA vs Gag. (q) CD69 and CXCR6 co-expression on infected Gag+ and uninfected Gag- lymph node resting memory CD4+ T cells  $\pm$  IL7. Data are the mean $\pm$ SEM. Paired two-tailed *t*-test or one-way ANOVA with Bonferroni or Dunnett's post-test were used. \**p*<0.05 ; \*\*, *p*<0.01; \*\*\*, *p*<0.001; n.s., not significant.

**Fig. 3 Vpr drives HIV-1-induced T<sub>RM</sub>-induction in resting memory CD4+ T cells.** Resting memory CD4+ T cells were co-cultured with HIV-1 infected primary CD4+ T cells infected with HIV-1 WT or mutant viruses, or uninfected donor cells (mock). (a) CD69 upregulation in response to IL7 compared to mock (n=9). (b) CD69 expression on HIV-1 infected Gag+ resting memory CD4+ T cells compared to uninfected Gag- bystander cells (n=9). (c) Quantification of cell-to-cell spread of HIV-1 WT and  $\Delta$ Vpr to resting memory CD4+ T cells (n=9). (d) CD69/CXCR6/CD49a co-expression on resting



memory CD4<sup>+</sup> T cells infected with HIV-1 WT or  $\Delta$ Vpr (n=9). (e) CD69, CXCR6 and PRDM1 (Blimp1) mRNA levels from FACS sorted infected resting memory CD4<sup>+</sup> T cells. Fold change relative to uninfected (mock) is shown (n=5). (f) IFN $\gamma$  expression by HIV-1 infected resting memory CD4<sup>+</sup> T cells at 72h in response to IL7 (n=3). (g) CD69 and (h) CD69/CXCR6 co-expression in response to IL7 in the presence of integrase inhibitor Raltegravir (n=6). (i) Quantification of integrated provirus and 2LTR circles in FACS sorted target CD4<sup>+</sup> memory T cells after 72h of cell-to-cell spread in the presence or absence of Raltegravir. (j) Western blot showing Vpr packaging into HIV-1 WT and Vpr-mutant virions. (k) CD69 upregulation in response to IL7 on resting memory CD4<sup>+</sup> T cells infected with HIV-1 WT,  $\Delta$ Vpr or Vpr mutants (n=9). (l) as for (k) showing CD69 expression on HIV-1 infected Gag<sup>+</sup> memory T cells compared to uninfected Gag<sup>-</sup> bystander cells. (m) Co-expression of CD69 and CXCR6 from (k) (n=9). Data are the mean $\pm$ SEM. Paired two-tailed *t*-test or one-way ANOVA with Bonferroni or Dunnett's post-test were used. 2LTR circles (i) were compared by unpaired one-tailed *t*-test. \*, *p*<0.05 ; \*\*, *p*<0.01; \*\*\*, *p*<0.001; n.s., not significant.

715

**Fig. 4 Transcriptional profiling of HIV-1 infected resting memory CD4<sup>+</sup> T cells.** (a) Heatmap showing hierarchical clustering of 226 differentially expressed genes (DEG) of infected (HIV-1 WT) over uninfected (Mock) resting memory CD4<sup>+</sup> T cells (adjusted *p*-value < 0.01, Fold change  $\pm$  1.2). Mean log<sub>2</sub> TPM of 4 biological repeats are shown. Cytokine indicates presence or absence of IL7. Virus indicates infection with HIV-1 WT, HIV-1  $\Delta$ Vpr or uninfected (Mock) conditions. (b) Principal component analysis (PCA) of (a), with ellipses indicating 95% CI. (c) and (d) show scatter plots of mean log<sub>2</sub> TPMs of DEGs from HIV-1 WT/Mock (grey circles) or HIV-1  $\Delta$ Vpr/Mock (orange circles) in the absence (c) or presence (d) of IL7 (adjusted *p*-value < 0.01, Fold change  $\pm$  1.2). Lines indicate line of identity (LOD). Genes above or below LOD are up or downregulated, respectively. (e) and (f) Venn diagrams showing overlap of DEGs comparing expression profiles of HIV-1 WT/Mock with (e) HIV-1  $\Delta$ Vpr/Mock or (f) HIV-1  $\Delta$ Vpr/HIV-1 WT. (g) GSEA was performed on expression profiles comparing HIV-1 WT / Mock (black) or HIV-1  $\Delta$ Vpr/HIV-1 WT (grey). Normalised enrichment scores are shown for significantly enriched Hallmark gene sets are shown (FDR *q*-value<0.05 and NES>1.75). (h) and (i) top ten significantly enriched canonical pathways

730 predicted by ingenuity pathway (IPA) analysis of DEGs (h) HIV-1 WT/Mock or (i) HIV-1  $\Delta$ Vpr/HIV-1  
731 WT (adjusted p-value<0.05). (j) Cytokines and (k) transcription regulators predicted to be upstream  
732 regulators by IPA of gene expression signatures HIV-1 WT/Mock (black) or HIV-1  $\Delta$ Vpr/Mock  
733 (grey), line indicates p=0.05.

734

735 **Fig. 5 Vpr drives a T<sub>RM</sub>-like transcriptomic program in HIV-1 infected resting memory CD4+**  
736 **T cells.** (a) Heatmap showing hierarchical clustering based on a T<sub>RM</sub> core gene expression  
737 signature<sup>21</sup> that was performed to compare transcriptional profiles of HIV-1 infected resting  
738 memory CD4 T cells (Reuschl et al, 2021) (Mock, HIV-1 WT, HIV-1  $\Delta$ Vpr) with previously  
739 described gene expression profiles (Kumar et al, 2017) of T<sub>RM</sub> (CD69 POS), non-T<sub>RM</sub> (CD69 NEG)  
740 tissue-derived T cells (lung and spleen) and blood-derived CD69- (CD69 NEG) T cells. Cytokine  
741 indicates presence or absence of IL7. Virus indicates infection with HIV-1 WT, HIV-1  $\Delta$ Vpr or  
742 uninfected (Mock) conditions. n/a, not applicable. (b) shows the T<sub>RM</sub> signature score for the  
743 indicated conditions calculated based on (a). Subsets from<sup>21</sup> are indicated in red, shown are CD4+  
744 or CD8+ T cells from lungs or spleens. T<sub>RM</sub>+, CD69+ T cells; T<sub>RM</sub>-, CD69- T cells. T<sub>RM</sub> signature  
745 scores for resting CD4 memory T cells infected or uninfected are shown in the presence or  
746 absence of IL7. Means are shown.

747

748

749 **Extended data Fig. 1.** (a) Experimental set-up schematic. (b) Flow cytometry gating strategy. (c)  
750 Ki67, CD69 and HLA-DR expression of CD3+CD4+ T cells from unstimulated PBMCs (n=8). (d)  
751 Ki67 expression on resting and activated primary CD4+ T cells. Representative flow cytometry plots.  
752 (e) MCM2 expression on resting and activated primary CD4+ T cells. Representative flow cytometry  
753 plots. (f) Resting or (g) mitogenically-activated primary target CD4+ T cells cultured with HIV-1  
754 infected Jurkat T cells separated by a 0.4 $\mu$ m transwell or in direct co-culture. Target cell infection  
755 levels was measured by intracellular staining for Gag. Representative flow cytometry plots are

756 shown. **(h)** Infection levels of target CD4+ T cells determined by intracellular Gag staining and flow  
 757 cytometry (n=2). **(i)** Proportion of CD45RA+ naïve and CD45RA- memory CD4+ T cells in  
 758 unstimulated PBMCs (n=8). **(j)** Resting target CD4+ T cells were cultured with mock-treated or HIV-  
 759 1-infected donor cells. Surface expression of CD45RA and CCR7 were measured after 72h of co-  
 760 culture. Representative flow cytometry plots are shown. **(k)** Quantification of T cell subsets in infected  
 761 (Gag+) and uninfected (Gag-) resting CD4+ T cells according to CD45RA/CD62L expression (n=3).  
 762  $T_{naïve} = CD45RA+/CD62L+$ ,  $T_{EMRA} = CD45RA+/CD62L-$ ,  $T_{EM} = CD45RA-/CD62L-$ ,  $T_{CM} = CD45RA-$   
 763  $/CD62L+$ . Data are shown as mean±SEM.

764

765 **Extended data Fig. 2.** **(a)** Representative flow cytometry plots of CD45RA+ and CD45RA- CD4+ T  
 766 cells pre- and post-isolation. **(b)** Representative histogram of intracellular Gag staining in resting  
 767 naïve (CD45RA+) and memory (CD45RA-) CD4+ T cells after 72h of cell-to-cell spread ± T20. **(c)**  
 768 Representative histogram of intracellular Gag-levels in resting naïve (CD45RA+) and memory  
 769 (CD45RA-) CD4+ T cells after 72h of cell-to-cell spread ± Efavirenz. **(d)** Representative histogram  
 770 of CD4 surface levels in resting naïve (CD45RA+) and memory (CD45RA-) CD3+ T cells after 72h  
 771 of cell-to-cell spread. **(e)** Mean post-sort population purity of T cells from (Fig. 1 n-p) was 99.92%  
 772 target cells of which 99.86% were memory T cells (n=5).

773

774 **Extended data Fig. 3** **(a and b)** Representative flow cytometry plots showing **(a)** Ki67 and Gag, or  
 775 **(b)** MCM2 and Gag staining of resting CD4+ T cells after co-culture with mock or HIV-1 infected  
 776 primary donor CD4+ T cells. **(c)** FACS sorted CD69- resting naïve or memory CD4+ T cells co-  
 777 cultured with HIV-1 infected primary CD4+ donor T cells and infection of targets measured by Gag  
 778 staining (n=4). **(d)** FACS sorted CD69- CD4+ T cells co-cultured with HIV-1 infected primary CD4+  
 779 donor T cells. CD69 expression was measured on resting memory CD4+ T cells (n=4). **(e)** Total  
 780 CD69 expression alongside CD69 with or without HLA-DR co-expression on infected resting memory  
 781 T cells (n=6). **(f)** Expression of  $T_{RM}$ -markers CXCR6, CD49A and CD69 on resting CD4+ memory T  
 782 cells from unstimulated PBMCs (n=8). **(g)** Quantification of cell-to-cell spread of HIV-1 WT to resting  
 783 memory CD4+ T cells in the presence or absence of IL7 (n=10). **(h and i)** CD69 expression on

784 infected resting memory CD4<sup>+</sup> target T cells in the presence or absence of (h) IL12 (n=4) or (i) TFGβ  
 785 (n=4). (j) CD69 expression on infected resting memory CD4<sup>+</sup> T cells with IL7 added at the indicated  
 786 times post cell-mixing (n=5). (k) CD69/CXCR6 co-expression from (j) (n=5). (l) CD69/CD101 co-  
 787 expression on infected resting memory CD4<sup>+</sup> T cells (n=3) (m) CD69 upregulation in response to  
 788 IL7 on resting memory CD4<sup>+</sup> T cells infected HIV-1 NL4.3, or transmitter-founder viruses CH040  
 789 and CH077 comparing infected Gag<sup>+</sup> and uninfected Gag<sup>-</sup> bystander cells (n=7). (n) CD69/CXCR6  
 790 co-expression on resting memory CD4<sup>+</sup> T cells from (i) (n=7). (o) CD69/CX3CR1 co-expression on  
 791 infected resting memory CD4<sup>+</sup> T cells (n=3). (p) CD103 expression and (q) CD69/CD103 co-  
 792 expression on infected resting memory CD4<sup>+</sup> T cells (n=4). Data are the mean±SEM. Paired two-  
 793 tailed *t*-test or one-way ANOVA with Bonferroni post-test was used. For (i), median+IQR is shown  
 794 and Kruskal-Wallis test was used to compare groups \*, *p*<0.05 ; \*\*, *p*<0.01; \*\*\*, *p*<0.001; n.s., not  
 795 significant.

796

797 **Extended data Fig. 4** Resting memory CD4<sup>+</sup> T cells were co-cultured with HIV-1 infected primary  
 798 CD4<sup>+</sup> T cells infected with HIV-1 WT or mutant viruses. Representative flow cytometry plots of HIV-  
 799 1 Gag and CD69 co-expression in the presence or absence of IL7 from three independent  
 800 experiments are shown (a-c).

801

802 **Extended data Fig. 5** (a) CD69 surface expression on resting CD45RA<sup>-</sup> memory CD4<sup>+</sup> T cells  
 803 following co-culture with primary CD4<sup>+</sup> donor T cells infected with HIV-1 NL4.3 (WT), ΔVpr, ΔNef or  
 804 ΔVpu or uninfected (mock) donors (n=9). (b) CXCR6 expression from (a) (n=9). (c) CD69/CXCR6  
 805 co-expression from (a) (n=9). (d) As for (b) but cells were incubated in the presence of IL7 (n=9). (e)  
 806 CD69/CXCR6 surface co-expression from (d) (n=9). (f) Gag MFI of cell-to-cell spread of HIV-1 WT  
 807 and ΔVpr to resting memory CD4<sup>+</sup> T cells (n=10). Correlation plot of CD69 MFI with Gag MFI in  
 808 absence (g) or presence (h) of IL7 (n=18). (i) *S1PR1* and *KLF2* mRNA levels in FACS sorted resting  
 809 memory CD4<sup>+</sup> T cells from Fig. 3e. Fold change over mock is shown (n=5). (j) CD69 expression on  
 810 infected resting memory CD4<sup>+</sup> T cells ± Ruxilitinib (n=4). (k) CD127 MFI on infected resting memory  
 811 CD4<sup>+</sup> T cells ± IL7 (n=7). (l) Representative histogram of intracellular STAT5-phosphorylation in

812 infected resting memory T cells. **(m)** Quantification of **(l)** (n=10). Data are the mean±SEM. One-way  
813 ANOVA with Dunnet's post-test was used. Statistical significance is shown relative to mock treated  
814 cells (no HIV-1). R<sup>2</sup> in (g) and (h) was determined by simple linear regression. \*, p<0.05 ; \*\*, p<0.01;  
815 \*\*\*, p<0.001; n.s., not significant.

816

817 **Extended data Fig. 6 (a) and (b)** Venn diagrams showing overlap of DEGs comparing expression  
818 profiles of HIV-1 WT+IL7/Mock+IL7 with **(e)** HIV-1 ΔVpr+IL7/Mock+IL7 or **(f)** HIV-1 ΔVpr+IL7/HIV-1  
819 WT+IL7. **(g)** GSEA was performed on expression profiles comparing HIV-1 WT+IL7/Mock+IL7  
820 (black) or HIV-1 ΔVpr+IL7/HIV-1 WT+IL7 (grey). Normalised enrichment scores are shown for  
821 significantly enriched Hallmark gene sets are shown (FDR q-value<0.05 and NES>1.75). **(h)** and **(i)**  
822 top ten significantly enriched canonical pathways predicted by ingenuity pathway (IPA) analysis of  
823 DEGs **(h)** HIV-1 WT+IL7/Mock+IL7 or **(i)** HIV-1 ΔVpr+IL7/HIV-1 WT+IL7 (adjusted p-value<0.05). **(j)**  
824 Cytokines and **(k)** transcription regulators predicted to be upstream regulators by IPA of gene  
825 expression signatures HIV-1 WT+IL7/Mock+IL7 (black) or HIV-1 ΔVpr+IL7/Mock+IL7 (grey), line  
826 indicates p=0.05.

827

828 **Extended data Fig. 7 (a)** Western blot showing siRNA knockdown of DCAF1 in CD3/CD28-activated  
829 CD4+ T cells 48h post transfection. Two representative samples are shown. **(b)** Number of live CD3+  
830 Target T cells recovered after 72h of cell-to-cell spread into control or DCAF1 siRNA-treated T cells  
831 (n=3).

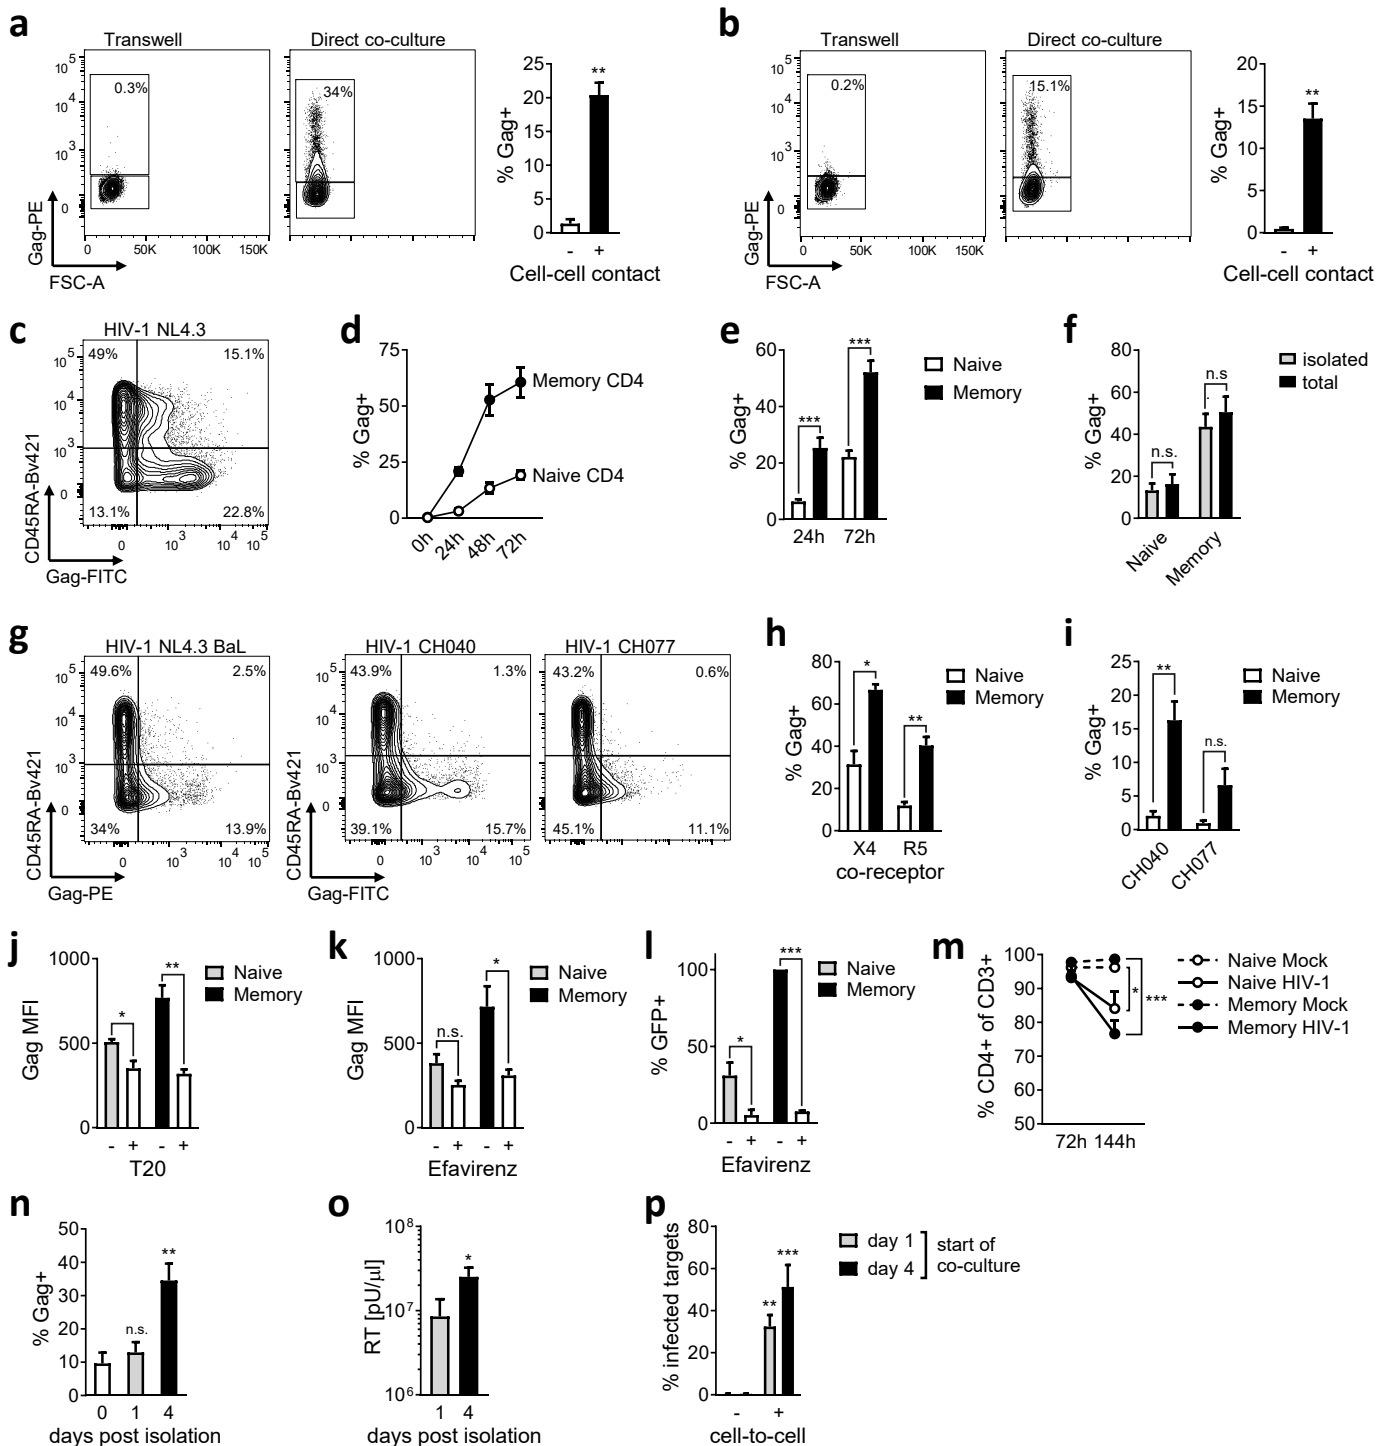

**Fig. 1 HIV-1 exploits cell-to-cell spread to preferentially infect resting memory CD4<sup>+</sup> T cells.** HIV-1 NL4.3 infected (a) Jurkat or (b) mitogenically-activated primary CD4<sup>+</sup> donor T cells co-cultured with resting primary CD4<sup>+</sup> target T cells separated by a 0.4 $\mu$ m transwell (cell-free) or direct co-culture (cell-cell). Target cell infection was measured by intracellular staining for HIV-1 Gag protein. Representative flow cytometry plots are shown. Bar graphs show mean of independent experiments (n=4). (c,d) Cell-to-cell spread from activated primary donor CD4<sup>+</sup> T cells to resting primary target CD4<sup>+</sup> T cells preferentially infects CD45RA-memory CD4<sup>+</sup> T cells. A representative flow cytometry plot and quantification is shown (n=4). (e) Quantification of infection performed as in (c) (n=11). (f) HIV-1 infection of target CD4<sup>+</sup> T cells as part of the total resting CD4<sup>+</sup> T cell population (total) compared to pre-isolated naive and memory CD4<sup>+</sup> target T cells (isolated) (n=9). (g) Representative flow cytometry plots of cell-to-cell infection of resting CD4<sup>+</sup> T cells with CCR5-tropic HIV-1 NL4.3 BaL and transmitter founder viruses HIV-1 CH040 and CH077 as performed in (c). (h) Quantification of infection of CXCR4 (X4) and CCR5 (R5)-tropic viruses (n=4) and (i) transmitter/founder viruses HIV-1 CH040 and CH077 (n=7). (j) Cell-to-cell infection of resting CD4<sup>+</sup> T cells is reduced by the HIV-1 fusion-inhibitor T20 (n=6) and (k) the reverse transcriptase inhibitor Efavirenz (n=6) measured by intracellular Gag staining (MFI) or (l) HIV-1 LTR-driven GFP-reporter gene expression (n=4). (m) HIV-1 infection downregulates CD4 expression. Shown are the percentage of CD4<sup>+</sup> cells of the total CD3<sup>+</sup> target cell population (n=6). Resting CD4<sup>+</sup> memory T cells were isolated after 72h of cell-to-cell spread by FACS sorting and cultured for 4 days. HIV-1 infection was measured by intracellular Gag staining (n) and virus release measured by culture supernatant RT activity (o) (n=5-7). T cells from (n) were recovered at day 1 or 4 post isolation and cultured with uninfected eFluor450+ target Jurkat T cells. Infection of Jurkat T cells was measured after 72h (p) (n=3). Data are the mean $\pm$ SEM. Paired two-tailed *t*-test or one-way ANOVA with Bonferroni post-test were used. For (m), median+IQR is shown and Friedman test with Dunn's post-test was used. For (o), unpaired one-tailed *t*-test was used. \*, *p*<0.05; \*\*, *p*<0.01; \*\*\*, *p*<0.001; n.s., not significant.



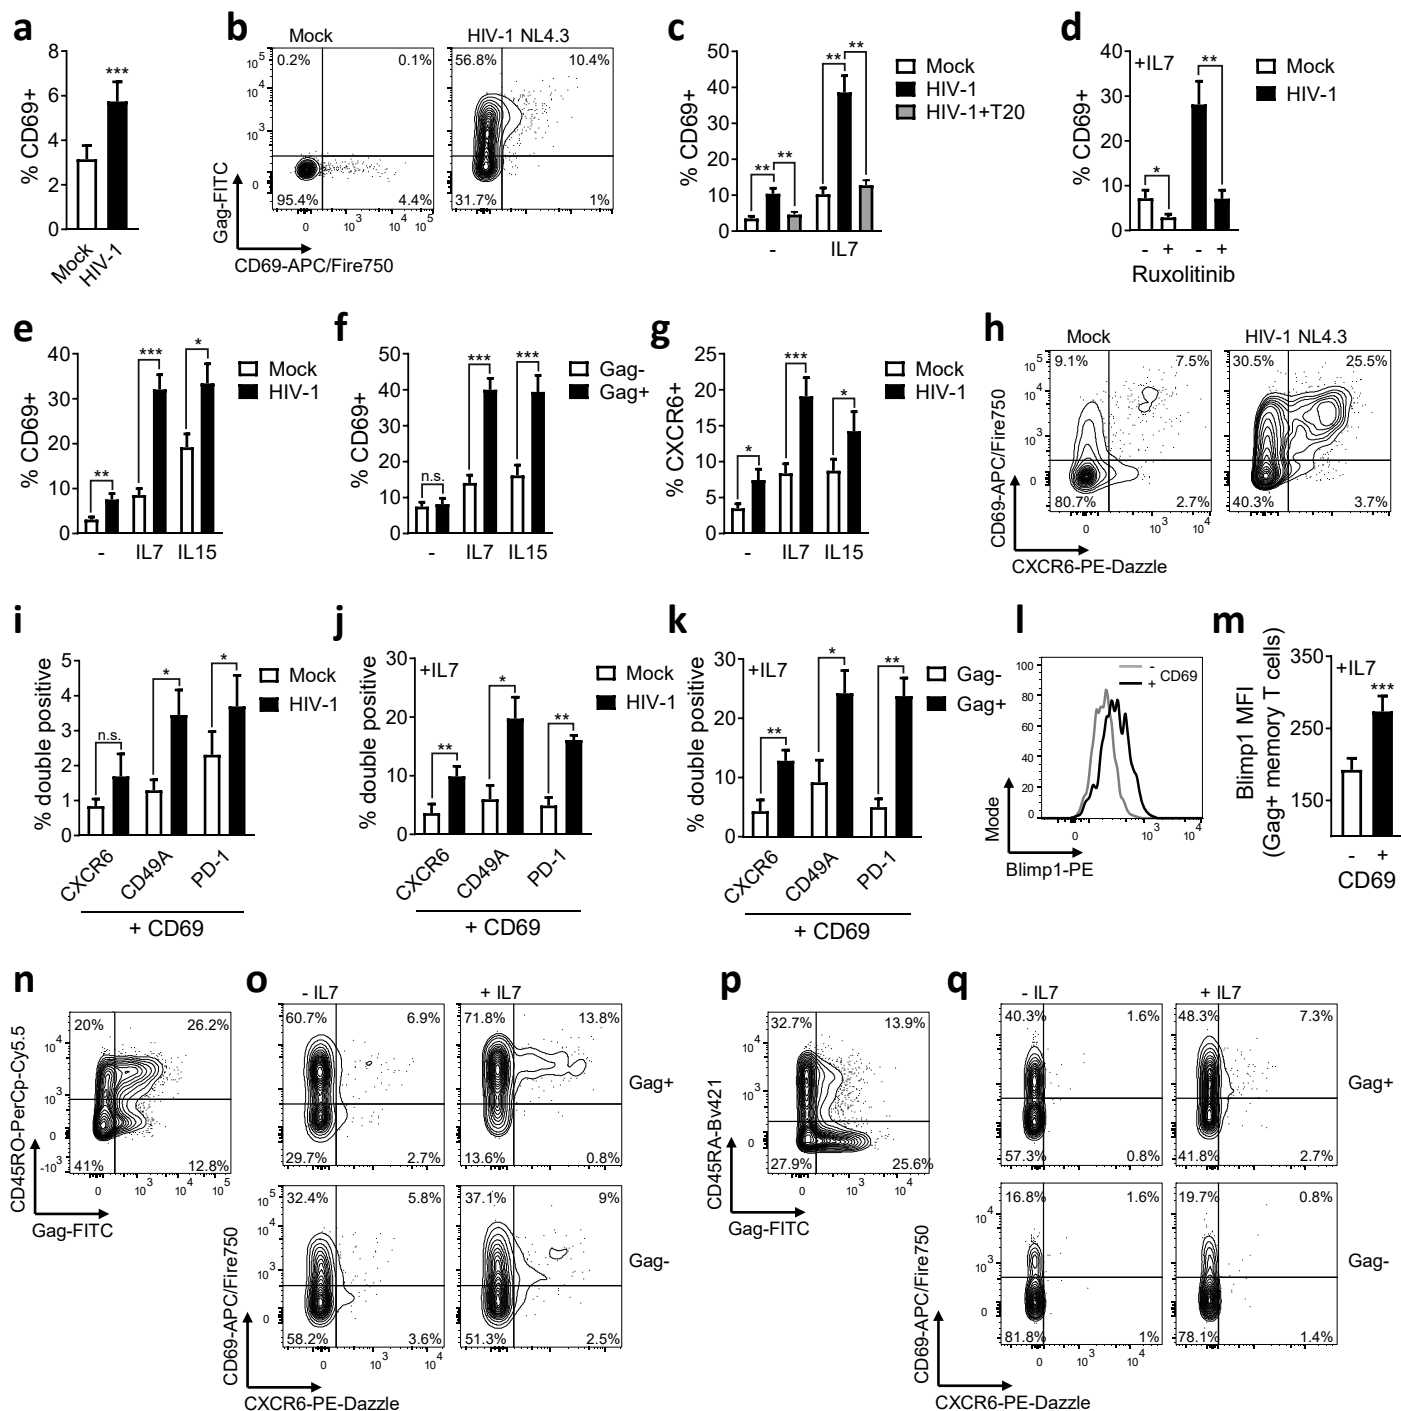

**Fig. 2 HIV-1 infection induces a  $T_{RM}$ -like phenotype in resting memory CD4+ T cells.** (a) CD69 expression on resting memory CD4+ target T cells following co-culture with HIV-1 infected primary donor T cells or uninfected donor T cells (mock) (n=17). (b) Representative flow cytometry plots from (a). (c) CD69 expression on infected resting memory CD4+ T cells  $\pm$  IL7 and T20 (n=7). (d) CD69 expression on infected resting memory CD4+ T cells  $\pm$  IL7 and Ruxolitinib (n=8). (e) CD69 expression on infected resting memory CD4+ T cells in response to IL7 and IL15 (n=11). (f) CD69 expression on infected Gag+ resting memory CD4+ T cells and uninfected Gag- bystander cells in response to IL7 and IL15 (n=11). (g) CXCR6 surface expression from (f) (n=11). (h) Representative flow cytometry plots of CD69 and CXCR6 co-expression. (i) Co-expression of CD69 with CXCR6, CD49A or PD-1 on infected resting memory CD4+ T cells (n=5-7). (j) As for (i) in the presence of IL7 (n=4-7). (k) As for (i) comparing infected Gag+ memory CD4+ T cells and uninfected Gag- bystander cells. (l) and (m) Blimp-1 expression in CD69+ infected resting memory CD4+ T cells and infected CD69- cells in response to IL7 (n=8). (n) Total lymphocytes from cellularised tonsils co-cultured with HIV-1 infected Jurkat T cells. Infection of resting CD4+ T cells (live CD3+/CD8-/Ki67- lymphocytes) shown as CD45RO vs Gag. (o) CD69 and CXCR6 co-expression on infected Gag+ and uninfected Gag- tonsil resting memory CD4+ T cells  $\pm$  IL7. (p) Total lymphocytes from mediastinal lymph nodes co-cultured with HIV-1 infected activated autologous LN-derived lymphocytes. Infection of resting CD4+ T cells (live CD3+/CD8-/Ki67- lymphocytes) shown as CD45RA vs Gag. (q) CD69 and CXCR6 co-expression on infected Gag+ and uninfected Gag- lymph node resting memory CD4+ T cells  $\pm$  IL7. Data are the mean $\pm$ SEM. Paired two-tailed *t*-test or one-way ANOVA with Bonferroni or Dunnett's post-test were used. \**p*<0.05; \*\**p*<0.01; \*\*\**p*<0.001; n.s., not significant.

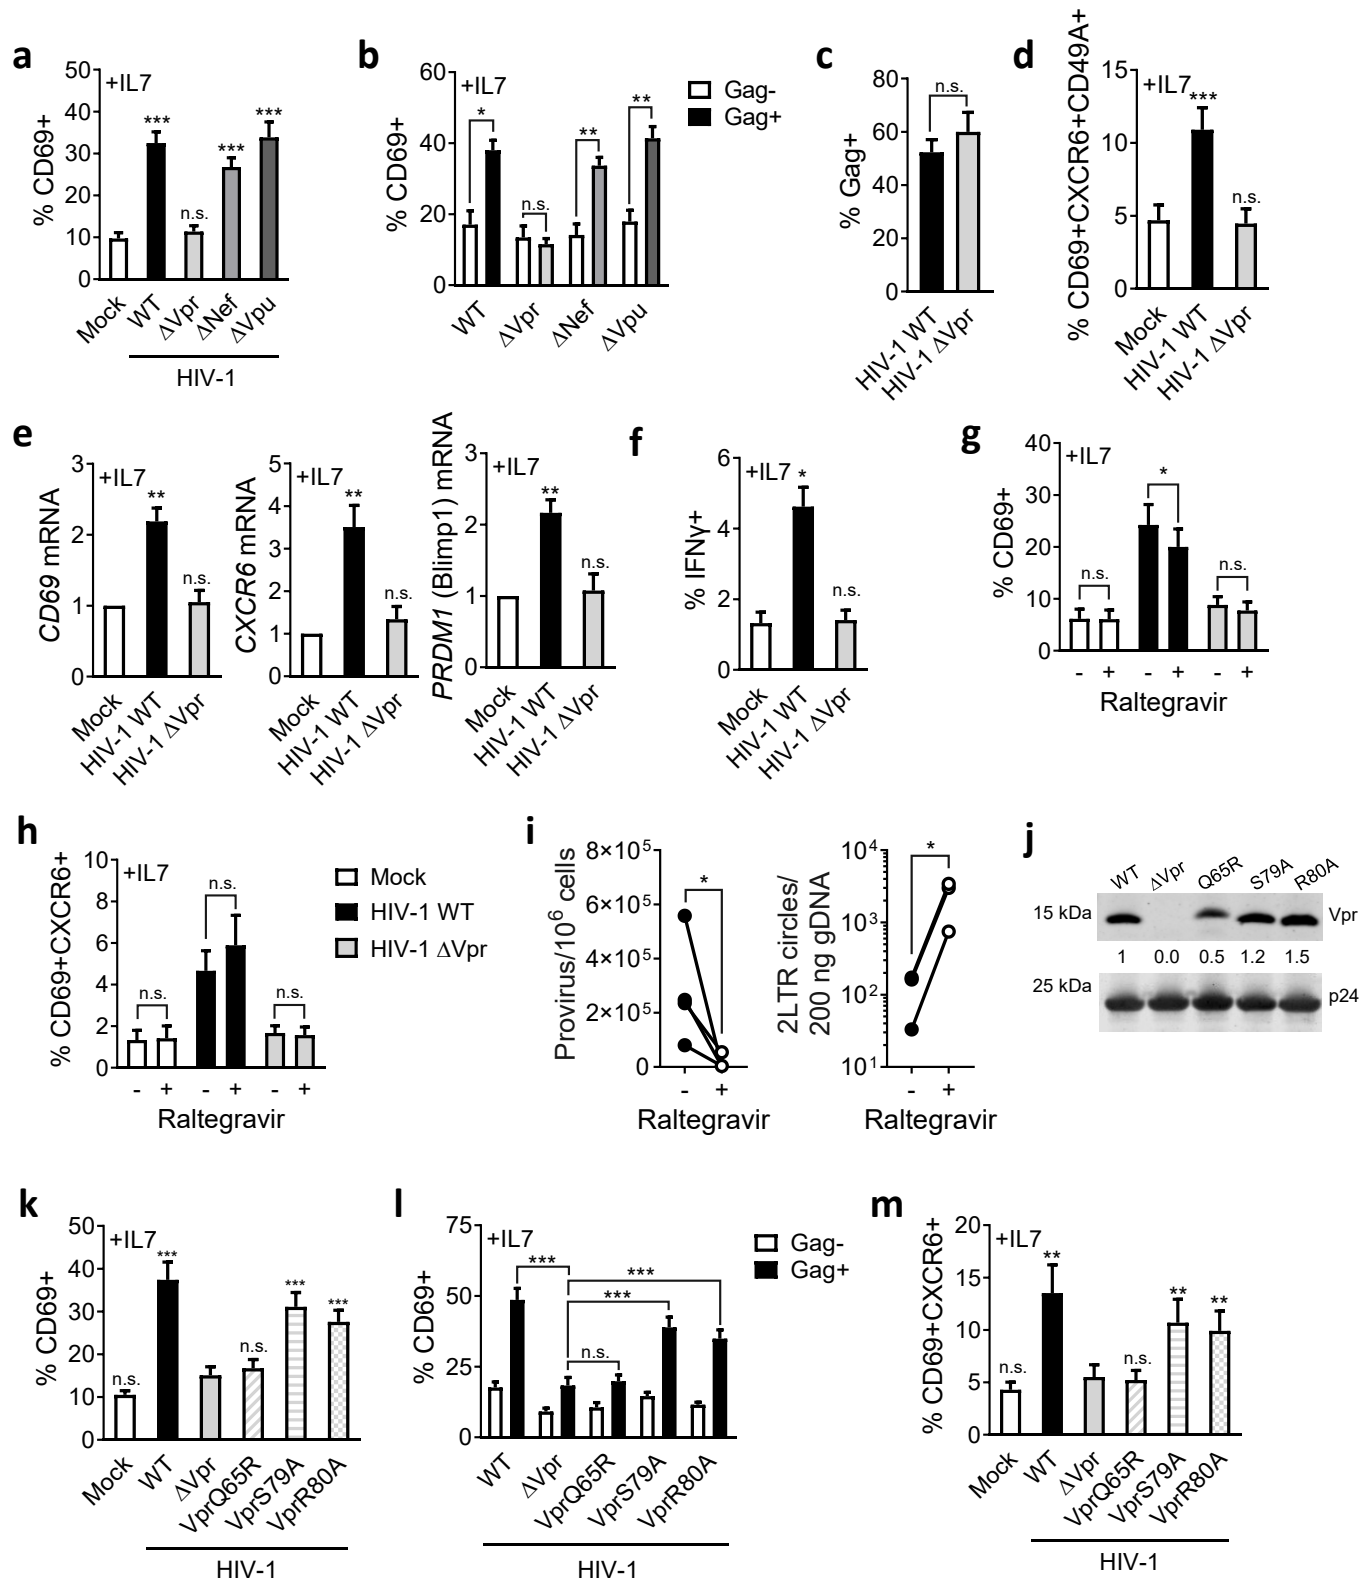

**Fig. 3 Vpr drives HIV-1-induced  $T_{RM}$ -induction in resting memory CD4+ T cells.** Resting memory CD4+ T cells were co-cultured with HIV-1 infected primary CD4+ T cells infected with HIV-1 WT or mutant viruses, or uninfected donor cells (mock). (a) CD69 upregulation in response to IL7 compared to mock (n=9). (b) CD69 expression on HIV-1 infected Gag+ resting memory CD4+ T cells compared to uninfected Gag- bystander cells (n=9). (c) Quantification of cell-to-cell spread of HIV-1 WT and  $\Delta$ Vpr to resting memory CD4+ T cells (n=9). (d) CD69/CXCR6/CD49a co-expression on resting memory CD4+ T cells infected with HIV-1 WT or  $\Delta$ Vpr (n=9). (e) CD69, CXCR6 and PRDM1 (Blimp1) mRNA levels from FACS sorted infected resting memory CD4+ T cells. Fold change relative to uninfected (mock) is shown (n=5). (f) IFN $\gamma$  expression by HIV-1 infected resting memory CD4+ T cells at 72h in response to IL7 (n=3). (g) CD69 and (h) CD69/CXCR6 co-expression in response to IL7 in the presence of integrase inhibitor Raltegravir (n=6). (i) Quantification of integrated provirus and 2LTR circles in FACS sorted target CD4+ memory T cells after 72h of cell-to-cell spread in the presence or absence of Raltegravir. (j) Western blot showing Vpr packaging into HIV-1 WT and Vpr-mutant virions. (k) CD69 upregulation in response to IL7 on resting memory CD4+ T cells infected with HIV-1 WT,  $\Delta$ Vpr or Vpr mutants (n=9). (l) as for (k) showing CD69 expression on HIV-1 infected Gag+ memory T cells compared to uninfected Gag- bystander cells. (m) Co-expression of CD69 and CXCR6 from (k) (n=9). Data are the mean $\pm$ SEM. Paired two-tailed *t*-test or one-way ANOVA with Bonferroni or Dunnett's post-test were used. 2LTR circles (i) were compared by unpaired one-tailed *t*-test. \*, *p*<0.05; \*\*, *p*<0.01; \*\*\*, *p*<0.001; n.s., not significant.

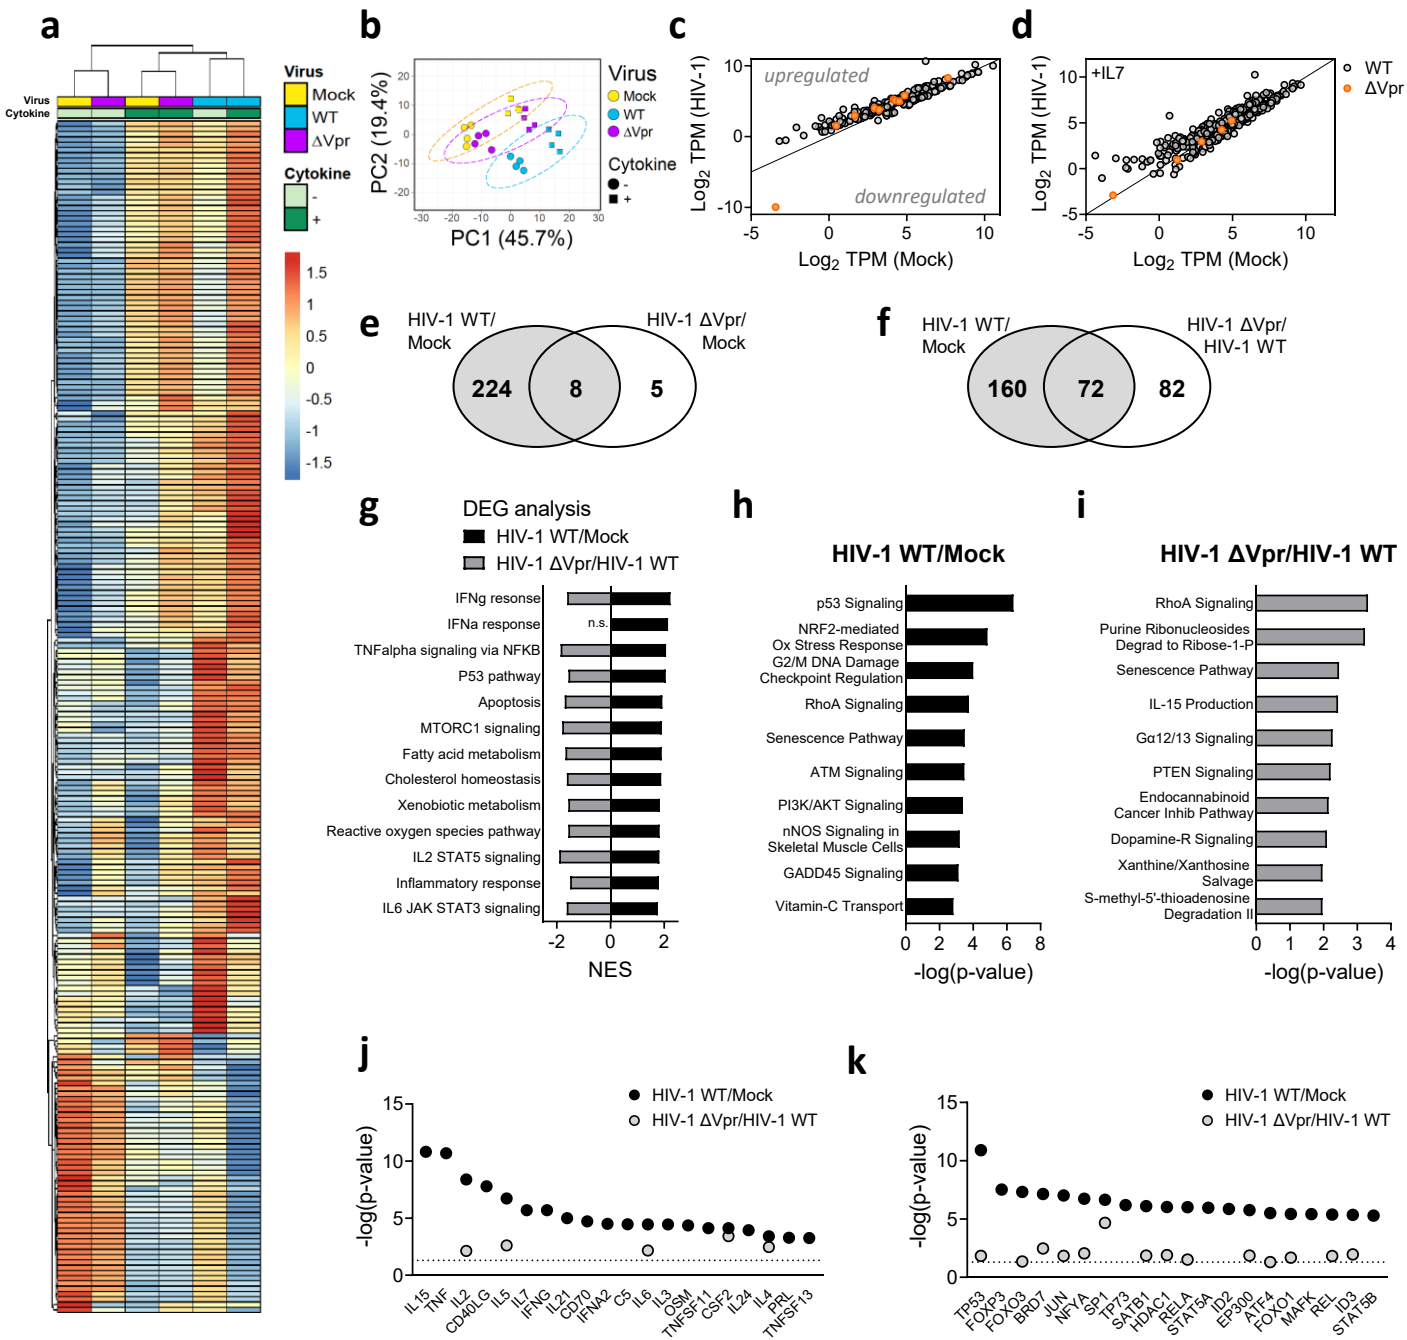

**Fig. 4 Transcriptional profiling of HIV-1 infected resting memory CD4<sup>+</sup> T cells.** (a) Heatmap showing hierarchical clustering of 226 differentially expressed genes (DEG) of infected (HIV-1 WT) over uninfected (Mock) resting memory CD4<sup>+</sup> T cells (adjusted p-value < 0.01, Fold change +/- 1.2). Mean log<sub>2</sub> TPM of 4 biological repeats are shown. Cytokine indicates presence or absence of IL7. Virus indicates infection with HIV-1 WT, HIV-1 ΔVpr or uninfected (Mock) conditions. (b) Principal component analysis (PCA) of (a), with ellipses indicating 95% CI. (c) and (d) show scatter plots of mean log<sub>2</sub> TPMs of DEGs from HIV-1 WT/Mock (grey circles) or HIV-1 ΔVpr/Mock (orange circles) in the absence (c) or presence (d) of IL7 (adjusted p-value < 0.01, Fold change +/- 1.2). Lines indicate line of identity (LOD). Genes above or below LOD are up or downregulated, respectively. (e) and (f) Venn diagrams showing overlap of DEGs comparing expression profiles of HIV-1 WT/Mock with (e) HIV-1 ΔVpr/Mock or (f) HIV-1 ΔVpr/HIV-1 WT. (g) GSEA was performed on expression profiles comparing HIV-1 WT / Mock (black) or HIV-1 ΔVpr/HIV-1 WT (grey). Normalised enrichment scores are shown for significantly enriched Hallmark gene sets (FDR q-value<0.05 and NES>1.75). (h) and (i) top ten significantly enriched canonical pathways predicted by ingenuity pathway (IPA) analysis of DEGs (h) HIV-1 WT/Mock or (i) HIV-1 ΔVpr/HIV-1 WT (adjusted p-value<0.05). (j) Cytokines and (k) transcription regulators predicted to be upstream regulators by IPA of gene expression signatures HIV-1 WT/Mock (black) or HIV-1 ΔVpr/Mock (grey), line indicates p=0.05.

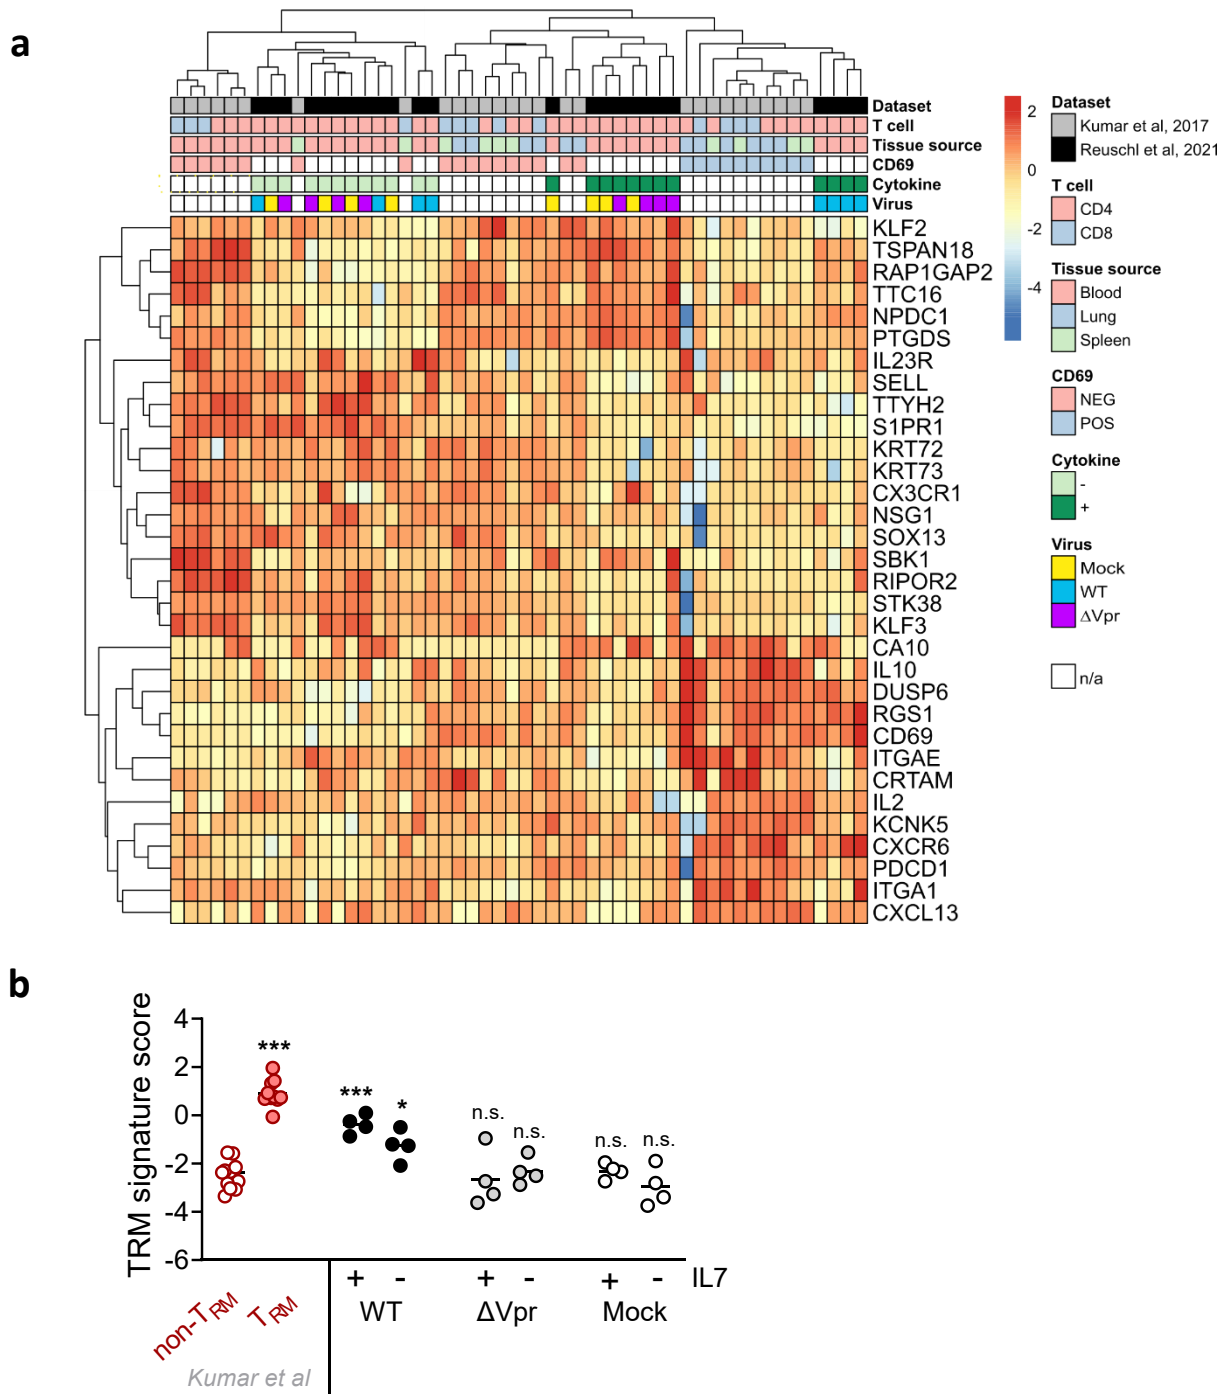

**Fig. 5 Vpr drives a T<sub>RM</sub>-like transcriptomic programme in HIV-1 infected resting memory CD4<sup>+</sup> T cells.** (a) Heatmap showing hierarchical clustering based on a T<sub>RM</sub> core gene expression signature<sup>21</sup> that was performed to compare transcriptional profiles of HIV-1 infected resting memory CD4 T cells (Reuschl et al, 2021) (Mock, HIV-1 WT, HIV-1 ΔVpr) with previously described gene expression profiles (Kumar et al, 2017) of T<sub>RM</sub> (CD69 POS), non-T<sub>RM</sub> (CD69 NEG) tissue-derived T cells (lung and spleen) and blood-derived CD69- (CD69 NEG) T cells. Cytokine indicates presence or absence of IL7. Virus indicates infection with HIV-1 WT, HIV-1 ΔVpr or uninfected (Mock) conditions. n/a, not applicable. (b) shows the T<sub>RM</sub> signature score for the indicated conditions calculated based on (a). Subsets from<sup>21</sup> are indicated in red, shown are CD4<sup>+</sup> or CD8<sup>+</sup> T cells from lungs or spleens. T<sub>RM</sub><sup>+</sup>, CD69<sup>+</sup> T cells; T<sub>RM</sub><sup>-</sup>, CD69<sup>-</sup> T cells. T<sub>RM</sub> signature scores for resting CD4 memory T cells infected or uninfected are shown in the presence or absence of IL7. Means are shown.

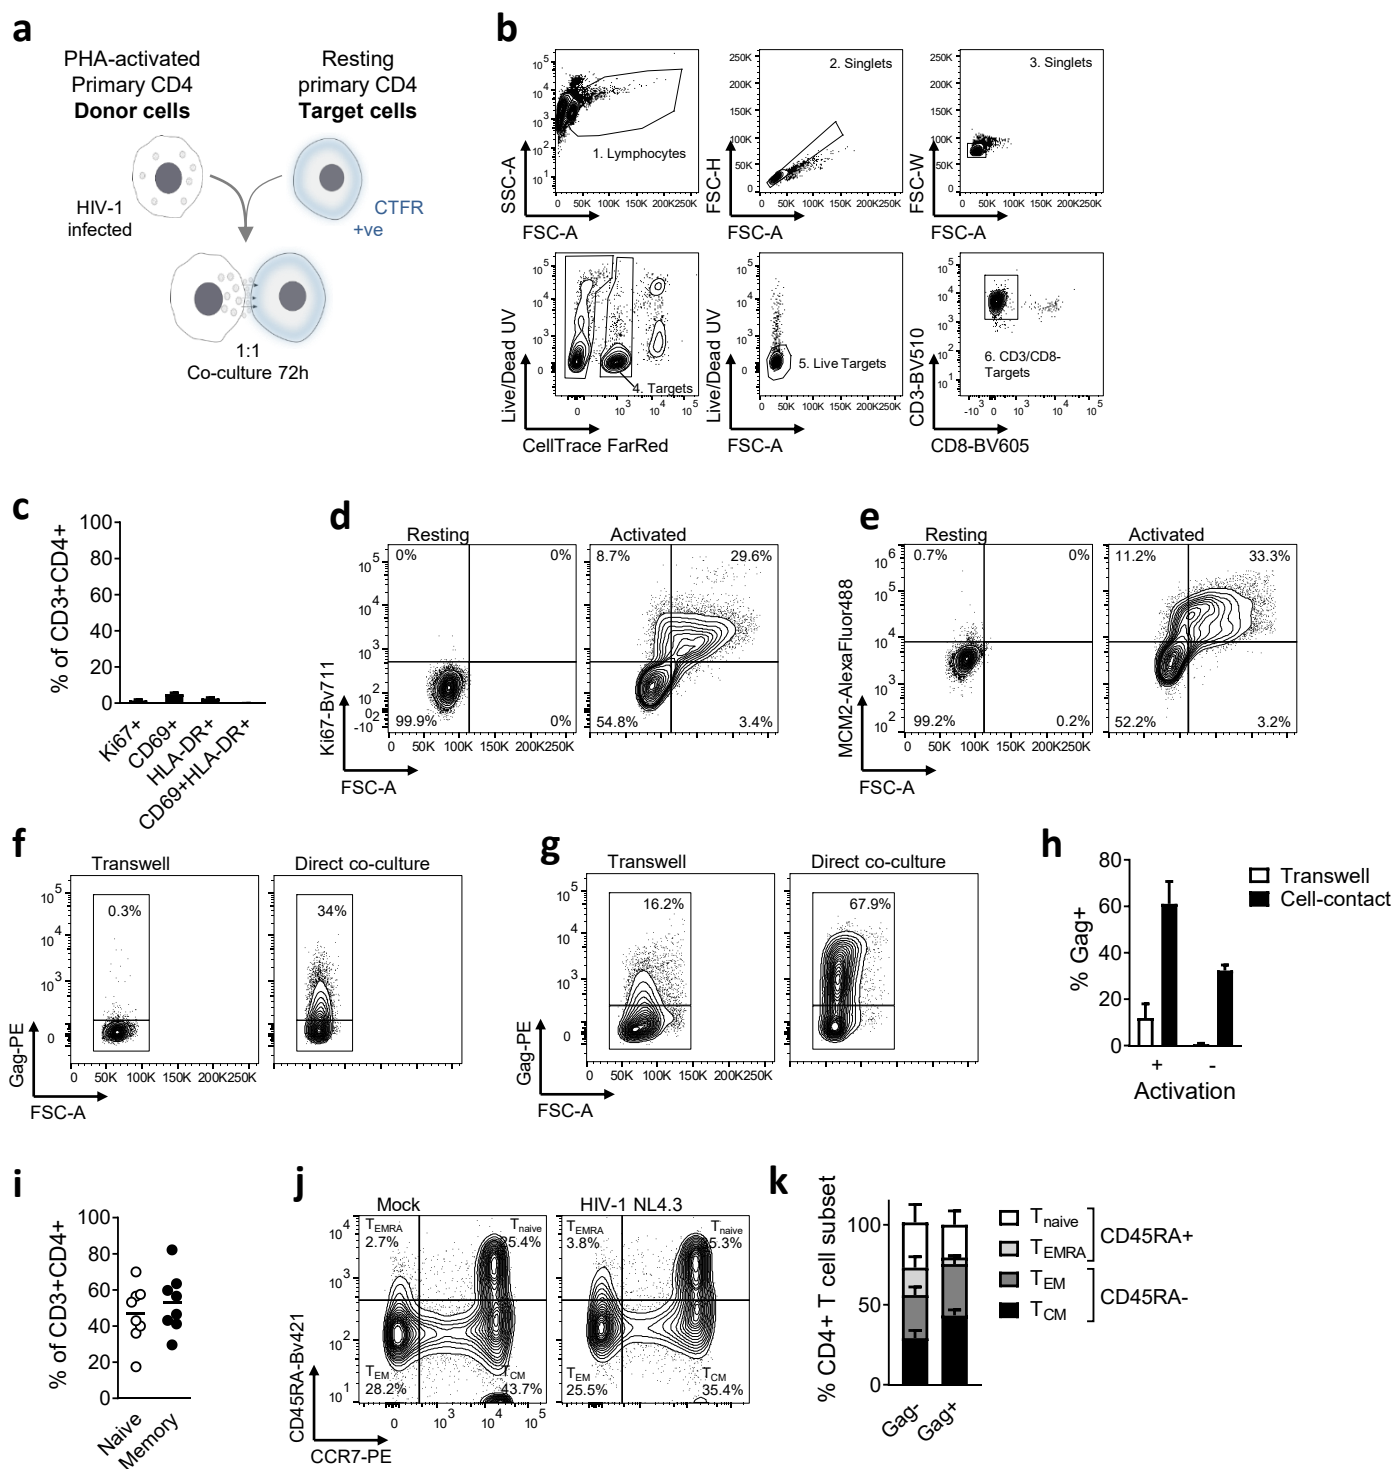

**Extended data Fig. 1.** (a) Experimental set-up schematic. (b) Flow cytometry gating strategy. (c) Ki67, CD69 and HLA-DR expression of CD3+CD4+ T cells from unstimulated PBMCs (n=8). (d) Ki67 expression on resting and activated primary CD4+ T cells. Representative flow cytometry plots. (e) MCM2 expression on resting and activated primary CD4+ T cells. Representative flow cytometry plots. (f) Resting or (g) mitogenically-activated primary target CD4+ T cells cultured with HIV-1 infected Jurkat T cells separated by a 0.4µm transwell or in direct co-culture. Target cell infection levels was measured by intracellular staining for Gag. Representative flow cytometry plots are shown. (h) Infection levels of target CD4+ T cells determined by intracellular Gag staining and flow cytometry (n=2). (i) Proportion of CD45RA+ naive and CD45RA- memory CD4+ T cells in unstimulated PBMCs (n=8). (j) Resting target CD4+ T cells were cultured with mock-treated or HIV-1-infected donor cells. Surface expression of CD45RA and CCR7 were measured after 72h of co-culture. Representative flow cytometry plots are shown. (k) Quantification of T cell subsets in infected (Gag+) and uninfected (Gag-) resting CD4+ T cells according to CD45RA/CD62L expression (n=3).  $T_{naive}$  = CD45RA+/CD62L+,  $T_{EMRA}$  = CD45RA+/CD62L-,  $T_{EM}$  = CD45RA-/CD62L-,  $T_{CM}$  = CD45RA-/CD62L+. Data are shown as mean±SEM.

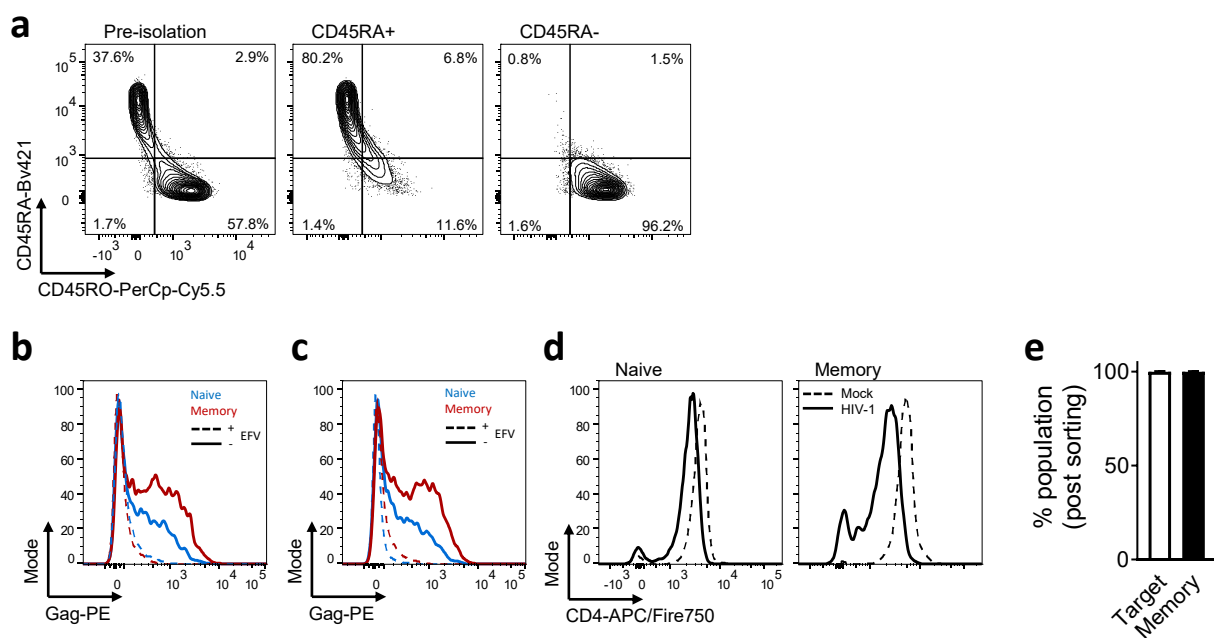

**Extended data Fig. 2.** (a) Representative flow cytometry plots of CD45RA<sup>+</sup> and CD45RA<sup>-</sup> CD4<sup>+</sup> T cells pre- and post-isolation. (b) Representative histogram of intracellular Gag staining in resting naïve (CD45RA<sup>+</sup>) and memory (CD45RA<sup>-</sup>) CD4<sup>+</sup> T cells after 72h of cell-to-cell spread  $\pm$  T20. (c) Representative histogram of intracellular Gag-levels in resting naïve (CD45RA<sup>+</sup>) and memory (CD45RA<sup>-</sup>) CD4<sup>+</sup> T cells after 72h of cell-to-cell spread  $\pm$  Efavirenz. (d) Representative histogram of CD4 surface levels in resting naïve (CD45RA<sup>+</sup>) and memory (CD45RA<sup>-</sup>) CD3<sup>+</sup> T cells after 72h of cell-to-cell spread. (e) Mean post-sort population purity of T cells from (Fig. 1 n-p) was 99.92% target cells of which 99.86% were memory T cells (n=5).

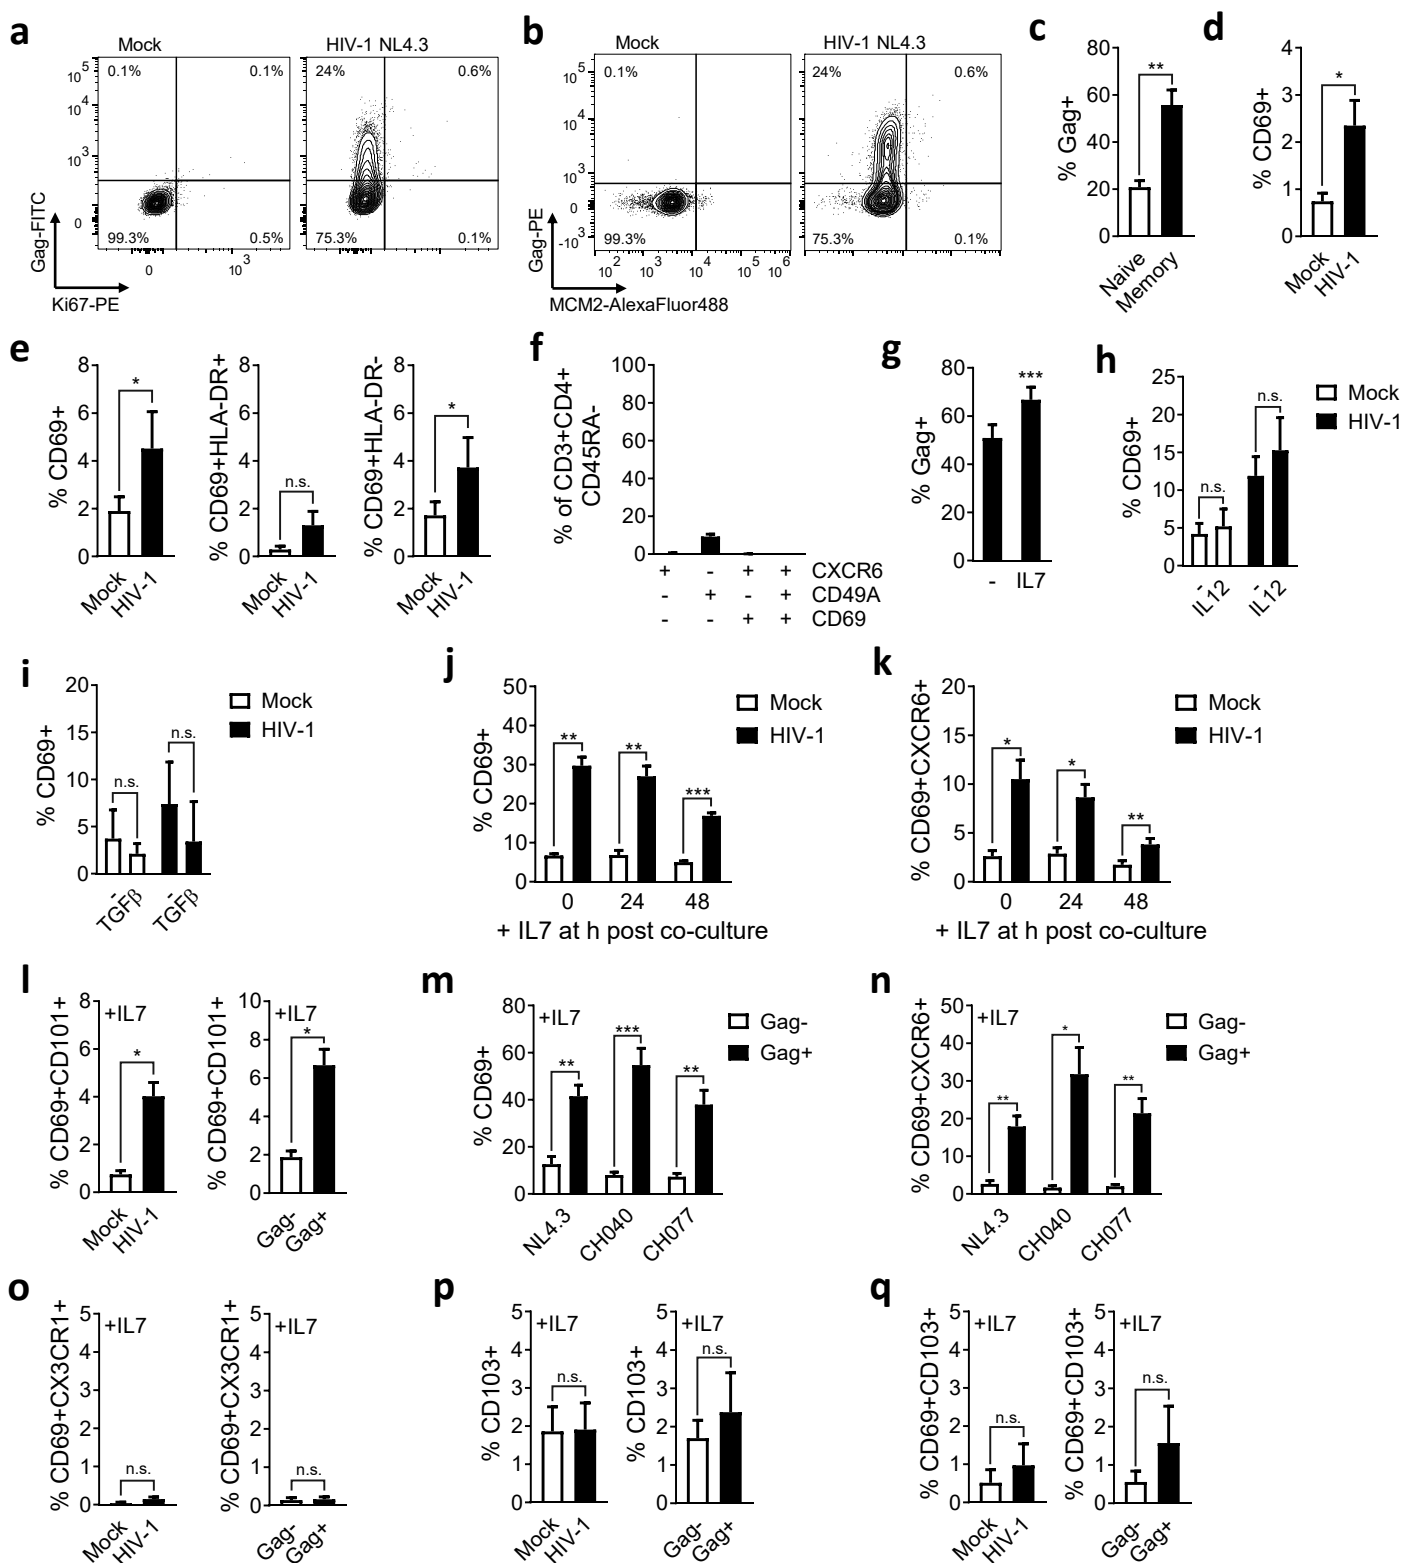

**Extended data Fig. 3** (a and b) Representative flow cytometry plots showing (a) Ki67 and Gag, or (b) MCM2 and Gag staining of resting CD4<sup>+</sup> T cells after co-culture with mock or HIV-1 infected primary donor CD4<sup>+</sup> T cells. (c) FACS sorted CD69<sup>-</sup> resting naïve or memory CD4<sup>+</sup> T cells co-cultured with HIV-1 infected primary CD4<sup>+</sup> donor T cells and infection of targets measured by Gag staining (n=4). (d) FACS sorted CD69<sup>-</sup> CD4<sup>+</sup> T cells co-cultured with HIV-1 infected primary CD4<sup>+</sup> donor T cells. CD69 expression was measured on resting memory CD4<sup>+</sup> T cells (n=4). (e) Total CD69 expression alongside CD69 with or without HLA-DR co-expression on infected resting memory T cells (n=6). (f) Expression of T<sub>RM</sub>-markers CXCR6, CD49A and CD69 on resting CD4<sup>+</sup> memory T cells from unstimulated PBMCs (n=8). (g) Quantification of cell-to-cell spread of HIV-1 WT to resting memory CD4<sup>+</sup> T cells in the presence or absence of IL7 (n=10). (h and i) CD69 expression on infected resting memory CD4<sup>+</sup> target T cells in the presence or absence of (h) IL12 (n=4) or (i) TGFβ (n=4). (j) CD69 expression on infected resting memory CD4<sup>+</sup> T cells with IL7 added at the indicated times post cell-mixing (n=5). (k) CD69/CXCR6 co-expression from (j) (n=5). (l) CD69/CD101 co-expression on infected resting memory CD4<sup>+</sup> T cells (n=3) (m) CD69 upregulation in response to IL7 on resting memory CD4<sup>+</sup> T cells infected HIV-1 NL4.3, or transmitter-founder viruses CH040 and CH077 comparing infected Gag<sup>+</sup> and uninfected Gag<sup>-</sup> bystander cells (n=7). (n) CD69/CXCR6 co-expression on resting memory CD4<sup>+</sup> T cells from (i) (n=7). (o) CD69/CX3CR1 co-expression on infected resting memory CD4<sup>+</sup> T cells (n=3). (p) CD103 expression and (q) CD69/CD103 co-expression on infected resting memory CD4<sup>+</sup> T cells (n=4). Data are the mean±SEM. Paired two-tailed *t*-test or one-way ANOVA with Bonferroni post-test was used. For (i), median+IQR is shown and Kruskal-Wallis test was used to compare groups \*, *p*<0.05 ; \*\*, *p*<0.01; \*\*\*, *p*<0.001; n.s., not significant.



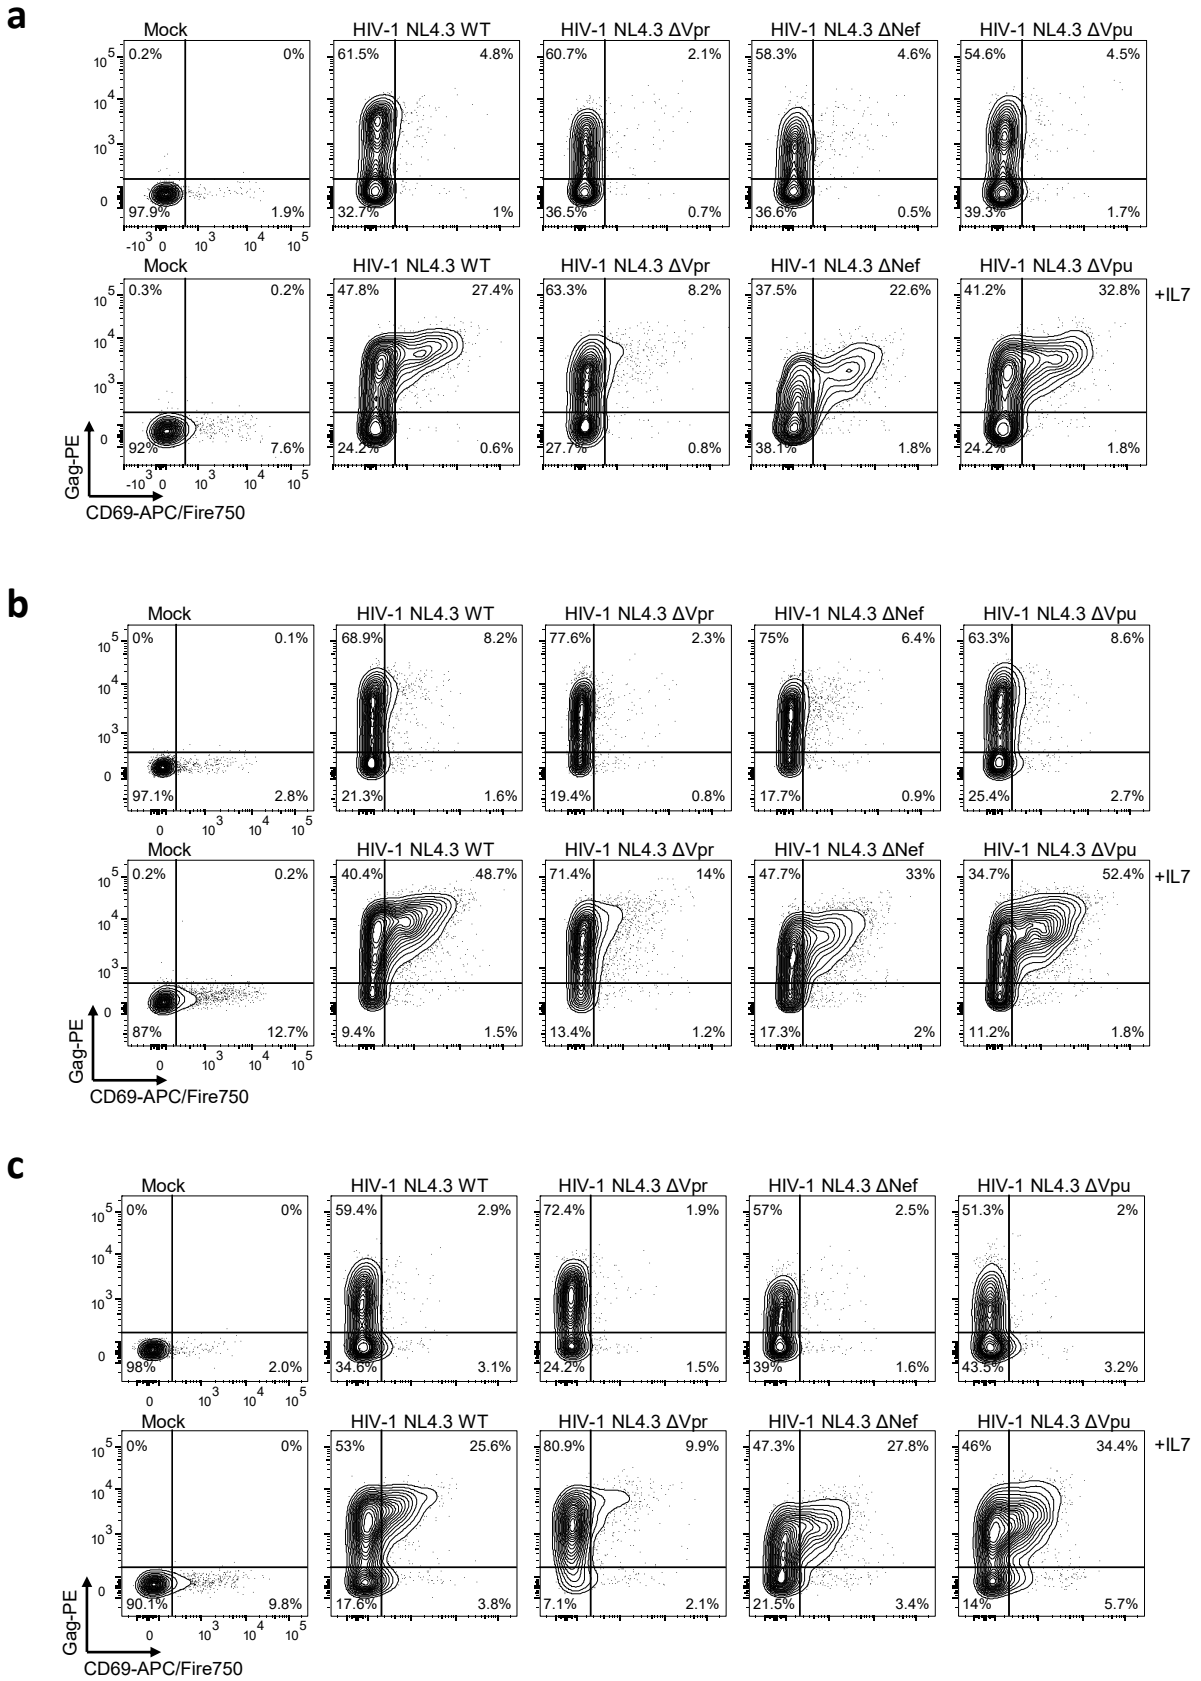

**Extended data Fig. 4** Resting memory CD4<sup>+</sup> T cells were co-cultured with HIV-1 infected primary CD4<sup>+</sup> T cells infected with HIV-1 WT or mutant viruses. Representative flow cytometry plots of HIV-1 Gag and CD69 co-expression in the presence or absence of IL7 from three independent experiments are shown (a-c).

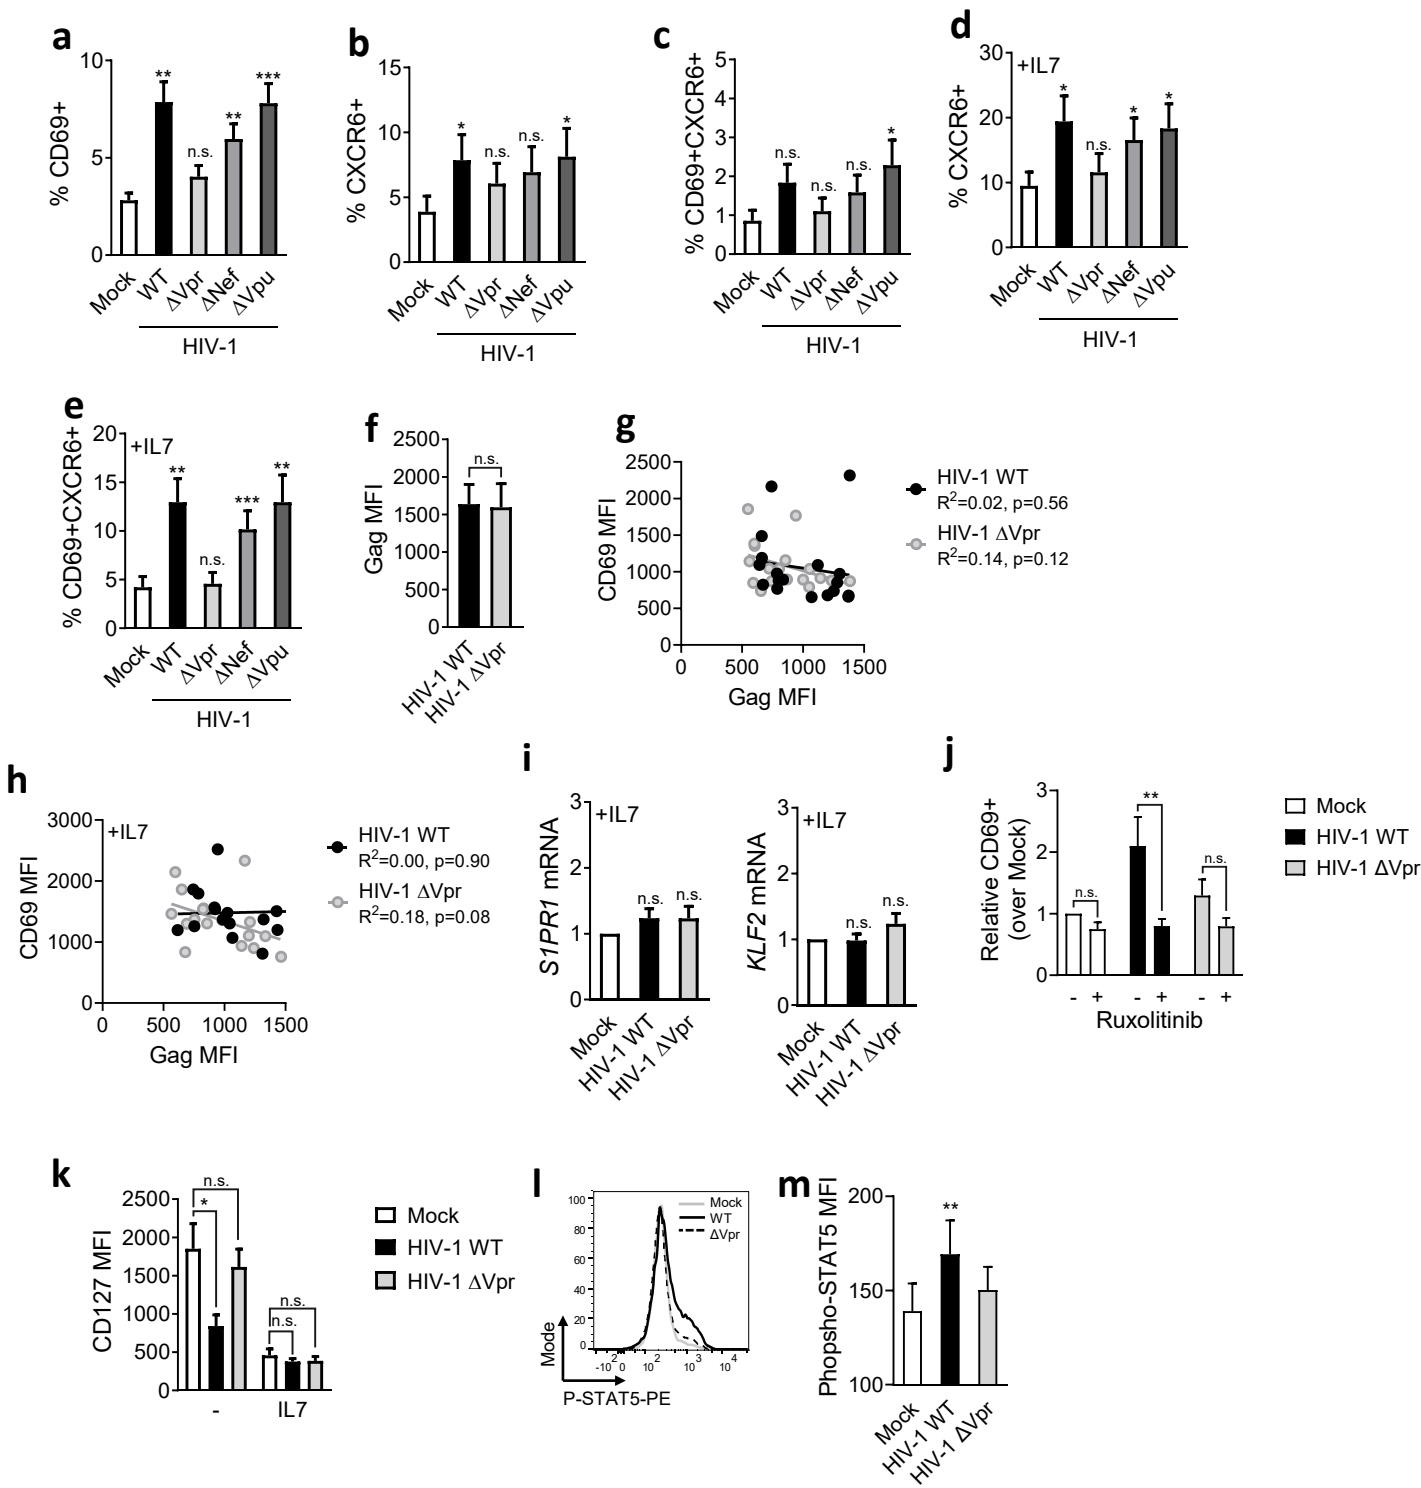

**Extended data Fig. 5** (a) CD69 surface expression on resting CD45RA<sup>-</sup> memory CD4<sup>+</sup> T cells following co-culture with primary CD4<sup>+</sup> donor T cells infected with HIV-1 NL4.3 (WT),  $\Delta$ Vpr,  $\Delta$ Nef or  $\Delta$ Vpu or uninfected (mock) donors (n=9). (b) CXCR6 expression from (a) (n=9). (c) CD69/CXCR6 co-expression from (a) (n=9). (d) As for (b) but cells were incubated in the presence of IL7 (n=9). (e) CD69/CXCR6 surface co-expression from (d) (n=9). (f) Gag MFI of cell-to-cell spread of HIV-1 WT and  $\Delta$ Vpr to resting memory CD4<sup>+</sup> T cells (n=10). Correlation plot of CD69 MFI with Gag MFI in absence (g) or presence (h) of IL7 (n=18). (i) *S1PR1* and *KLF2* mRNA levels in FACS sorted resting memory CD4<sup>+</sup> T cells from Fig. 3e. Fold change over mock is shown (n=5). (j) CD69 expression on infected resting memory CD4<sup>+</sup> T cells  $\pm$  Ruxilutinib (n=4). (k) CD127 MFI on infected resting memory CD4<sup>+</sup> T cells  $\pm$  IL7 (n=7). (l) Representative histogram of intracellular STAT5-phosphorylation in infected resting memory T cells. (m) Quantification of (l) (n=10). Data are the mean $\pm$ SEM. One-way ANOVA with Dunnet's post-test was used. Statistical significance is shown relative to mock treated cells (no HIV-1).  $R^2$  in (g) and (h) was determined by simple linear regression. \*,  $p<0.05$ ; \*\*,  $p<0.01$ ; \*\*\*,  $p<0.001$ ; n.s., not significant.

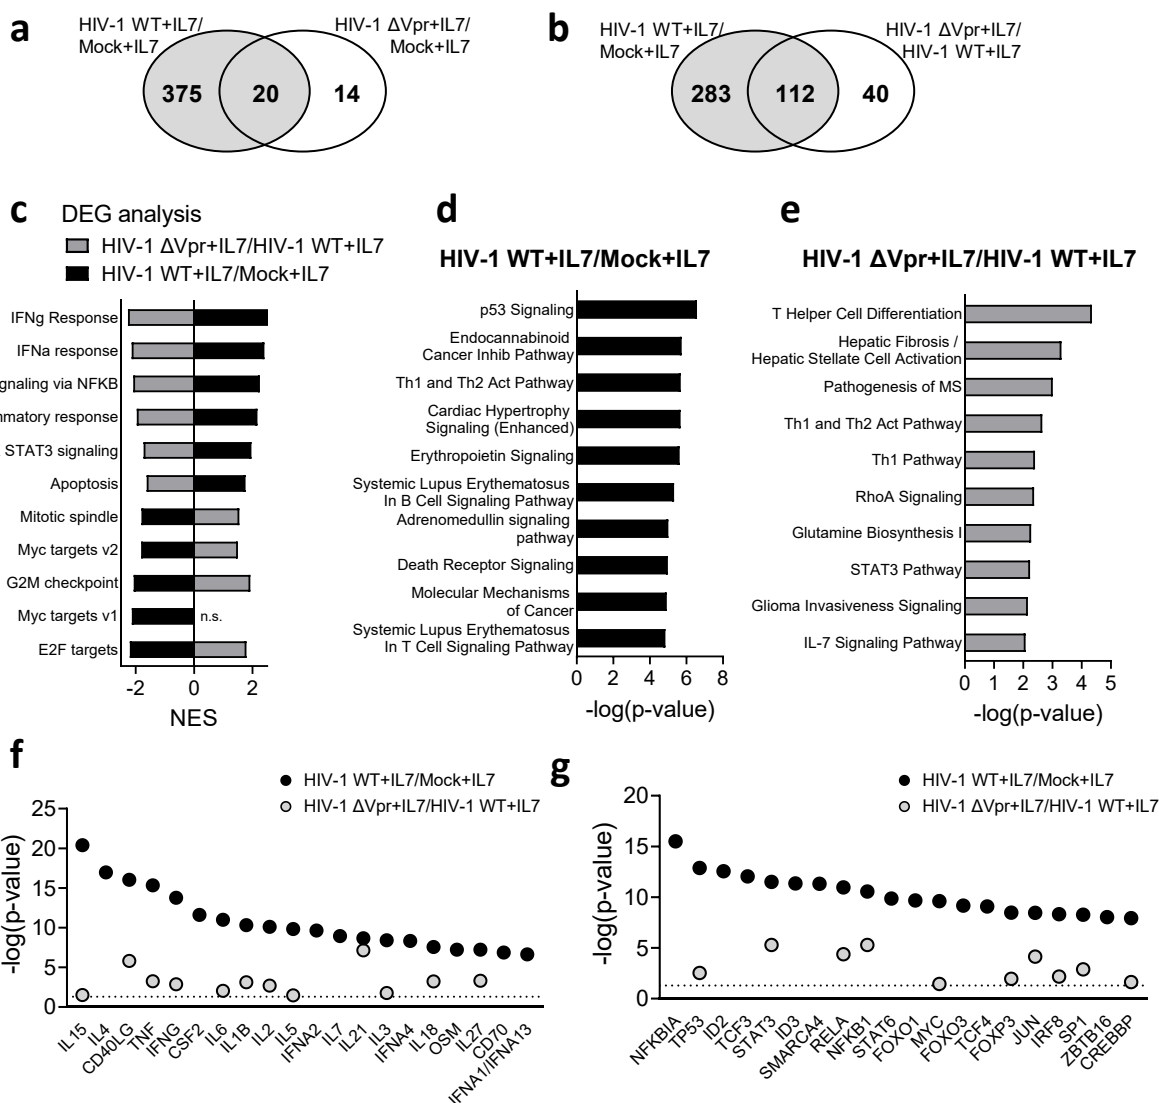

**Extended data Fig. 6** (a) and (b) Venn diagrams showing overlap of DEGs comparing expression profiles of HIV-1 WT+IL7/Mock+IL7 with (e) HIV-1 ΔVpr+IL7/Mock+IL7 or (f) HIV-1 ΔVpr+IL7/HIV-1 WT+IL7. (g) GSEA was performed on expression profiles comparing HIV-1 WT+IL7/Mock+IL7 (black) or HIV-1 ΔVpr+IL7/HIV-1 WT+IL7 (grey). Normalised enrichment scores are shown for significantly enriched Hallmark gene sets are shown (FDR q-value<0.05 and NES>1.75). (h) and (i) top ten significantly enriched canonical pathways predicted by ingenuity pathway (IPA) analysis of DEGs (h) HIV-1 WT+IL7/Mock+IL7 or (i) HIV-1 ΔVpr+IL7/HIV-1 WT+IL7 (adjusted p-value<0.05). (j) Cytokines and (k) transcription regulators predicted to be upstream regulators by IPA of gene expression signatures HIV-1 WT+IL7/Mock+IL7 (black) or HIV-1 ΔVpr+IL7/Mock+IL7 (grey), line indicates p=0.05.

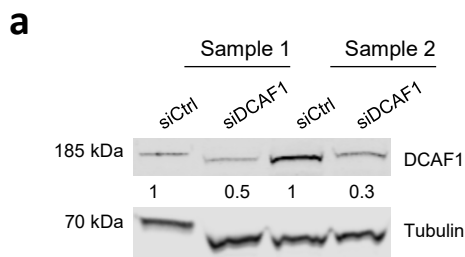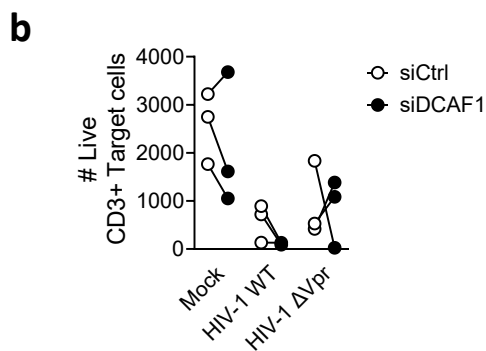

**Extended data Fig. 7** (a) Western blot showing siRNA knockdown of DCAF1 in CD3/CD28-activated CD4<sup>+</sup> T cells 48h post transfection. Two representative samples are shown. (b) Number of live CD3<sup>+</sup> Target T cells recovered after 72h of cell-to-cell spread into control or DCAF1 siRNA-treated T cells (n=3).
